# Supplementary material for: New stable aryl-substituted acyclic imino-N-heterocyclic carbene: synthesis, characterisation and coordination to early transition metals
Source: Royal Society of Chemistry journal article supplement (doi:10.1039/c1dt11565k), 2011-01-01
Supplement: c1dt11565k.pdf [file c1dt11565k.pdf]

# **New Stable Aryl-Substituted Acyclic Imino-*N*-Heterocyclic Carbene: Synthesis, Characterisation and Coordination to Early Transition Metals**

*Timothy G. Larocque,<sup>a</sup> Anna C. Badaj,<sup>a</sup> Sarim Dastgir<sup>a,b</sup> and Gino G. Lavoie<sup>\*a</sup>*

<sup>a</sup> Department of Chemistry, York University, 4700 Keele Street, Toronto, Ontario, M3J 1P3 (Canada).

Fax: +1 416-736-5936; Tel: +1 416-736-2100 Ext. 77728; E-mail: [glavoie@yorku.ca](mailto:glavoie@yorku.ca)

<sup>b</sup> Current address: Department of Chemistry, College of Science, Sultan Qaboos University, P.O. Box 36,  
Muscat 123, Sultanate of Oman

**Supplementary Material**  
**X-ray Data Table of Contents**

|           |                                                                                     |     |
|-----------|-------------------------------------------------------------------------------------|-----|
| Table 1.  | Crystal data and structure refinement for <b>2</b>                                  | S3  |
| Table 2.  | Atomic coordinates and equivalent isotropic displacement parameters for <b>2</b>    | S4  |
| Table 3.  | Bond lengths and angles for <b>2</b>                                                | S5  |
| Table 4.  | Anisotropic displacement parameters for <b>2</b>                                    | S8  |
| Table 5.  | Hydrogen coordinates and isotropic displacement parameters for <b>2</b>             | S9  |
| Table 6.  | Crystal data and structure refinement for <b>3a</b>                                 | S11 |
| Table 7.  | Atomic coordinates and equivalent isotropic displacement parameters for <b>3a</b>   | S12 |
| Table 8.  | Bond lengths and angles for <b>3a</b>                                               | S14 |
| Table 9.  | Anisotropic displacement parameters for <b>3a</b>                                   | S18 |
| Table 10. | Hydrogen coordinates and isotropic displacement parameters for <b>3a</b>            | S20 |
| Table 11. | Crystal data and structure refinement for <b>3b</b>                                 | S22 |
| Table 12. | Atomic coordinates and equivalent isotropic displacement parameters for <b>3b</b> . | S23 |
| Table 13. | Bond lengths and angles for <b>3b</b>                                               | S25 |
| Table 14. | Anisotropic displacement parameters for <b>3b</b>                                   | S29 |
| Table 15. | Hydrogen coordinates and isotropic displacement parameters for <b>3b</b>            | S31 |
| Table 16. | Crystal data and structure refinement for <b>4a</b>                                 | S33 |
| Table 17. | Atomic coordinates and equivalent isotropic displacement parameters for <b>4a</b>   | S34 |
| Table 18. | Bond lengths and angles for <b>4a</b>                                               | S35 |
| Table 19. | Anisotropic displacement parameters for <b>4a</b>                                   | S38 |
| Table 20. | Hydrogen coordinates and isotropic displacement parameters for <b>4a</b>            | S39 |
| Table 21. | Crystal data and structure refinement for <b>6b</b>                                 | S40 |
| Table 22. | Atomic coordinates and equivalent isotropic displacement parameters for <b>6b</b>   | S41 |
| Table 23. | Bond lengths and angles for <b>6b</b>                                               | S42 |
| Table 24. | Anisotropic displacement parameters for <b>6b</b>                                   | S51 |
| Table 25. | Hydrogen coordinates and isotropic displacement parameters for <b>6b</b>            | S53 |

Table 1. Crystal data and structure refinement for **2**.

|                                   |                                                |                 |
|-----------------------------------|------------------------------------------------|-----------------|
| Identification code               | k09214                                         |                 |
| Empirical formula                 | C <sub>25</sub> H <sub>31</sub> N <sub>3</sub> |                 |
| Formula weight                    | 373.53                                         |                 |
| Temperature                       | 150(1) K                                       |                 |
| Wavelength                        | 0.71073 Å                                      |                 |
| Crystal system                    | Triclinic                                      |                 |
| Space group                       | P -1                                           |                 |
| Unit cell dimensions              | a = 8.5723(3) Å                                | α = 70.656(2)°. |
|                                   | b = 11.8829(7) Å                               | β = 88.378(3)°. |
|                                   | c = 12.3644(8) Å                               | γ = 69.372(3)°. |
| Volume                            | 1106.61(10) Å <sup>3</sup>                     |                 |
| Z                                 | 2                                              |                 |
| Density (calculated)              | 1.121 Mg/m <sup>3</sup>                        |                 |
| Absorption coefficient            | 0.066 mm <sup>-1</sup>                         |                 |
| F(000)                            | 404                                            |                 |
| Crystal size                      | 0.34 x 0.34 x 0.20 mm <sup>3</sup>             |                 |
| Theta range for data collection   | 2.59 to 27.50°.                                |                 |
| Index ranges                      | -11 ≤ h ≤ 11, -14 ≤ k ≤ 15, -15 ≤ l ≤ 15       |                 |
| Reflections collected             | 10345                                          |                 |
| Independent reflections           | 4990 [R(int) = 0.0480]                         |                 |
| Completeness to theta = 27.50°    | 98.1 %                                         |                 |
| Absorption correction             | Semi-empirical from equivalents                |                 |
| Max. and min. transmission        | 0.985 and 0.768                                |                 |
| Refinement method                 | Full-matrix least-squares on F <sup>2</sup>    |                 |
| Data / restraints / parameters    | 4990 / 0 / 261                                 |                 |
| Goodness-of-fit on F <sup>2</sup> | 1.049                                          |                 |
| Final R indices [I > 2σ(I)]       | R1 = 0.0699, wR2 = 0.1747                      |                 |
| R indices (all data)              | R1 = 0.1269, wR2 = 0.2146                      |                 |
| Largest diff. peak and hole       | 0.423 and -0.270 e.Å <sup>-3</sup>             |                 |

Table 2. Atomic coordinates ( $\times 10^4$ ) and equivalent isotropic displacement parameters ( $\text{\AA}^2 \times 10^3$ ) for **2**.  $U(\text{eq})$  is defined as one third of the trace of the orthogonalized  $U^{ij}$  tensor.

|       | x        | y        | z       | U(eq) |
|-------|----------|----------|---------|-------|
| C(1)  | 7112(2)  | 2549(2)  | 7943(2) | 36(1) |
| C(2)  | 7055(3)  | 3033(2)  | 5977(2) | 41(1) |
| C(3)  | 6784(3)  | 4120(2)  | 6183(2) | 41(1) |
| C(4)  | 7487(2)  | 776(2)   | 7198(2) | 32(1) |
| C(5)  | 8993(2)  | -265(2)  | 8010(2) | 39(1) |
| C(6)  | 5014(2)  | 1388(2)  | 5985(2) | 33(1) |
| C(7)  | 4952(3)  | 1623(2)  | 4794(2) | 38(1) |
| C(8)  | 3450(3)  | 2388(2)  | 4130(2) | 45(1) |
| C(9)  | 2029(3)  | 2912(2)  | 4618(2) | 49(1) |
| C(10) | 2100(3)  | 2662(2)  | 5796(2) | 44(1) |
| C(11) | 3591(2)  | 1894(2)  | 6504(2) | 35(1) |
| C(12) | 6499(3)  | 1020(2)  | 4265(2) | 48(1) |
| C(13) | 3643(3)  | 1581(2)  | 7785(2) | 41(1) |
| C(14) | 6493(2)  | 4720(2)  | 7962(2) | 31(1) |
| C(15) | 4832(2)  | 5442(2)  | 8040(2) | 35(1) |
| C(16) | 4559(2)  | 6313(2)  | 8612(2) | 36(1) |
| C(17) | 5862(2)  | 6491(2)  | 9087(2) | 36(1) |
| C(18) | 7497(2)  | 5739(2)  | 9003(2) | 34(1) |
| C(19) | 7839(2)  | 4853(2)  | 8444(2) | 33(1) |
| C(20) | 3381(3)  | 5272(2)  | 7534(2) | 48(1) |
| C(21) | 5511(3)  | 7498(2)  | 9640(2) | 48(1) |
| C(22) | 9612(2)  | 4078(2)  | 8340(2) | 41(1) |
| C(23) | 8561(3)  | -484(2)  | 9257(2) | 50(1) |
| C(24) | 10518(3) | 143(2)   | 7831(3) | 52(1) |
| C(25) | 9374(3)  | -1512(2) | 7758(3) | 56(1) |
| N(1)  | 7246(2)  | 2088(2)  | 7042(2) | 33(1) |
| N(2)  | 6813(2)  | 3805(2)  | 7374(2) | 34(1) |
| N(3)  | 6513(2)  | 482(2)   | 6685(2) | 35(1) |

Table 3. Bond lengths [Å] and angles [°] for **2**.

---

|                |            |
|----------------|------------|
| C(1)-N(2)      | 1.354(3)   |
| C(1)-N(1)      | 1.380(3)   |
| C(2)-C(3)      | 1.338(3)   |
| C(2)-N(1)      | 1.388(3)   |
| C(3)-N(2)      | 1.393(3)   |
| C(4)-N(3)      | 1.266(3)   |
| C(4)-N(1)      | 1.444(3)   |
| C(4)-C(5)      | 1.526(3)   |
| C(5)-C(24)     | 1.533(3)   |
| C(5)-C(23)     | 1.534(3)   |
| C(5)-C(25)     | 1.535(3)   |
| C(6)-C(11)     | 1.399(3)   |
| C(6)-C(7)      | 1.404(3)   |
| C(6)-N(3)      | 1.425(3)   |
| C(7)-C(8)      | 1.377(3)   |
| C(7)-C(12)     | 1.513(3)   |
| C(8)-C(9)      | 1.382(3)   |
| C(9)-C(10)     | 1.385(3)   |
| C(10)-C(11)    | 1.395(3)   |
| C(11)-C(13)    | 1.500(3)   |
| C(14)-C(19)    | 1.393(3)   |
| C(14)-C(15)    | 1.400(3)   |
| C(14)-N(2)     | 1.445(2)   |
| C(15)-C(16)    | 1.390(3)   |
| C(15)-C(20)    | 1.511(3)   |
| C(16)-C(17)    | 1.387(3)   |
| C(17)-C(18)    | 1.394(3)   |
| C(17)-C(21)    | 1.505(3)   |
| C(18)-C(19)    | 1.388(3)   |
| C(19)-C(22)    | 1.502(3)   |
|                |            |
| N(2)-C(1)-N(1) | 101.48(19) |
| C(3)-C(2)-N(1) | 106.5(2)   |
| C(2)-C(3)-N(2) | 106.1(2)   |

|                   |            |
|-------------------|------------|
| N(3)-C(4)-N(1)    | 122.38(18) |
| N(3)-C(4)-C(5)    | 120.47(18) |
| N(1)-C(4)-C(5)    | 117.15(17) |
| C(4)-C(5)-C(24)   | 109.91(19) |
| C(4)-C(5)-C(23)   | 109.01(16) |
| C(24)-C(5)-C(23)  | 110.11(19) |
| C(4)-C(5)-C(25)   | 108.90(17) |
| C(24)-C(5)-C(25)  | 109.93(18) |
| C(23)-C(5)-C(25)  | 109.0(2)   |
| C(11)-C(6)-C(7)   | 121.56(18) |
| C(11)-C(6)-N(3)   | 119.69(19) |
| C(7)-C(6)-N(3)    | 118.26(17) |
| C(8)-C(7)-C(6)    | 118.5(2)   |
| C(8)-C(7)-C(12)   | 121.3(2)   |
| C(6)-C(7)-C(12)   | 120.24(19) |
| C(7)-C(8)-C(9)    | 121.2(2)   |
| C(8)-C(9)-C(10)   | 119.9(2)   |
| C(9)-C(10)-C(11)  | 121.1(2)   |
| C(10)-C(11)-C(6)  | 117.8(2)   |
| C(10)-C(11)-C(13) | 120.84(18) |
| C(6)-C(11)-C(13)  | 121.32(18) |
| C(19)-C(14)-C(15) | 121.82(18) |
| C(19)-C(14)-N(2)  | 119.37(16) |
| C(15)-C(14)-N(2)  | 118.80(17) |
| C(16)-C(15)-C(14) | 117.67(18) |
| C(16)-C(15)-C(20) | 120.91(18) |
| C(14)-C(15)-C(20) | 121.41(19) |
| C(17)-C(16)-C(15) | 122.38(18) |
| C(16)-C(17)-C(18) | 117.98(19) |
| C(16)-C(17)-C(21) | 120.65(18) |
| C(18)-C(17)-C(21) | 121.34(19) |
| C(19)-C(18)-C(17) | 121.95(19) |
| C(18)-C(19)-C(14) | 118.18(17) |
| C(18)-C(19)-C(22) | 120.88(18) |
| C(14)-C(19)-C(22) | 120.93(18) |
| C(1)-N(1)-C(2)    | 112.55(18) |

|                 |            |
|-----------------|------------|
| C(1)-N(1)-C(4)  | 123.25(18) |
| C(2)-N(1)-C(4)  | 124.15(17) |
| C(1)-N(2)-C(3)  | 113.41(17) |
| C(1)-N(2)-C(14) | 122.37(18) |
| C(3)-N(2)-C(14) | 124.18(18) |
| C(4)-N(3)-C(6)  | 123.86(18) |

---

Table 4. Anisotropic displacement parameters ( $\text{\AA}^2 \times 10^3$ ) for **2**. The anisotropic displacement factor exponent takes the form:  $-2p^2 [ h^2 a^* 2 U^{11} + \dots + 2 h k a^* b^* U^{12} ]$

|       | U <sup>11</sup> | U <sup>22</sup> | U <sup>33</sup> | U <sup>23</sup> | U <sup>13</sup> | U <sup>12</sup> |
|-------|-----------------|-----------------|-----------------|-----------------|-----------------|-----------------|
| C(1)  | 35(1)           | 35(1)           | 38(1)           | -15(1)          | 3(1)            | -10(1)          |
| C(2)  | 56(1)           | 40(1)           | 32(1)           | -13(1)          | 5(1)            | -22(1)          |
| C(3)  | 57(1)           | 37(1)           | 31(1)           | -7(1)           | 0(1)            | -21(1)          |
| C(4)  | 34(1)           | 31(1)           | 34(1)           | -15(1)          | 11(1)           | -13(1)          |
| C(5)  | 34(1)           | 31(1)           | 47(2)           | -12(1)          | -2(1)           | -8(1)           |
| C(6)  | 40(1)           | 29(1)           | 34(1)           | -13(1)          | 1(1)            | -14(1)          |
| C(7)  | 51(1)           | 34(1)           | 33(1)           | -10(1)          | 2(1)            | -21(1)          |
| C(8)  | 59(2)           | 42(1)           | 36(1)           | -8(1)           | -3(1)           | -26(1)          |
| C(9)  | 49(1)           | 42(2)           | 49(2)           | -5(1)           | -13(1)          | -17(1)          |
| C(10) | 39(1)           | 38(1)           | 51(2)           | -13(1)          | 0(1)            | -11(1)          |
| C(11) | 35(1)           | 33(1)           | 39(1)           | -14(1)          | 3(1)            | -13(1)          |
| C(12) | 66(2)           | 47(2)           | 39(2)           | -22(1)          | 14(1)           | -26(1)          |
| C(13) | 38(1)           | 46(1)           | 40(1)           | -19(1)          | 7(1)            | -14(1)          |
| C(14) | 35(1)           | 25(1)           | 30(1)           | -8(1)           | 3(1)            | -9(1)           |
| C(15) | 34(1)           | 30(1)           | 37(1)           | -8(1)           | 2(1)            | -11(1)          |
| C(16) | 33(1)           | 31(1)           | 39(1)           | -10(1)          | 7(1)            | -8(1)           |
| C(17) | 45(1)           | 32(1)           | 31(1)           | -11(1)          | 8(1)            | -14(1)          |
| C(18) | 40(1)           | 34(1)           | 30(1)           | -9(1)           | 2(1)            | -15(1)          |
| C(19) | 34(1)           | 28(1)           | 32(1)           | -7(1)           | 1(1)            | -10(1)          |
| C(20) | 35(1)           | 44(2)           | 66(2)           | -18(1)          | 0(1)            | -13(1)          |
| C(21) | 57(1)           | 43(1)           | 50(2)           | -25(1)          | 11(1)           | -17(1)          |
| C(22) | 36(1)           | 41(1)           | 46(2)           | -17(1)          | 0(1)            | -11(1)          |
| C(23) | 59(2)           | 40(1)           | 43(2)           | -3(1)           | -11(1)          | -18(1)          |
| C(24) | 33(1)           | 43(2)           | 78(2)           | -21(1)          | -2(1)           | -10(1)          |
| C(25) | 42(1)           | 39(2)           | 83(2)           | -25(2)          | -6(1)           | -5(1)           |
| N(1)  | 35(1)           | 32(1)           | 35(1)           | -14(1)          | 3(1)            | -13(1)          |
| N(2)  | 36(1)           | 30(1)           | 34(1)           | -12(1)          | 1(1)            | -11(1)          |
| N(3)  | 36(1)           | 34(1)           | 37(1)           | -15(1)          | 5(1)            | -12(1)          |

Table 5. Hydrogen coordinates ( $\times 10^4$ ) and isotropic displacement parameters ( $\text{\AA}^2 \times 10^3$ ) for **2**.

|        | x     | y     | z     | U(eq) |
|--------|-------|-------|-------|-------|
| H(2)   | 7107  | 2929  | 5246  | 50    |
| H(3)   | 6608  | 4941  | 5629  | 50    |
| H(8)   | 3391  | 2558  | 3323  | 54    |
| H(9)   | 1006  | 3443  | 4147  | 59    |
| H(10)  | 1116  | 3019  | 6127  | 53    |
| H(12A) | 6185  | 1129  | 3471  | 72    |
| H(12B) | 7009  | 105   | 4715  | 72    |
| H(12C) | 7303  | 1435  | 4268  | 72    |
| H(13A) | 2519  | 1978  | 7990  | 61    |
| H(13B) | 4416  | 1909  | 8035  | 61    |
| H(13C) | 4028  | 650   | 8167  | 61    |
| H(16)  | 3439  | 6804  | 8680  | 43    |
| H(18)  | 8403  | 5835  | 9340  | 41    |
| H(20A) | 3414  | 5490  | 6699  | 73    |
| H(20B) | 2325  | 5836  | 7696  | 73    |
| H(20C) | 3463  | 4380  | 7880  | 73    |
| H(21A) | 6514  | 7329  | 10120 | 72    |
| H(21B) | 4585  | 7476  | 10120 | 72    |
| H(21C) | 5205  | 8343  | 9040  | 72    |
| H(22A) | 9803  | 3165  | 8691  | 62    |
| H(22B) | 10384 | 4290  | 8737  | 62    |
| H(22C) | 9804  | 4275  | 7525  | 62    |
| H(23A) | 8228  | 325   | 9406  | 75    |
| H(23B) | 9544  | -1116 | 9785  | 75    |
| H(23C) | 7635  | -801  | 9377  | 75    |
| H(24A) | 10697 | 385   | 7012  | 78    |
| H(24B) | 11512 | -572  | 8281  | 78    |
| H(24C) | 10319 | 875   | 8086  | 78    |
| H(25A) | 8386  | -1756 | 7857  | 84    |
| H(25B) | 10318 | -2193 | 8292  | 84    |

H(25C)

9663

-1382

6965

84

Table 6. Crystal data and structure refinement for **3a**.

|                                   |                                                                   |                 |
|-----------------------------------|-------------------------------------------------------------------|-----------------|
| Identification code               | k1010                                                             |                 |
| Empirical formula                 | C <sub>26</sub> H <sub>33</sub> Cl <sub>6</sub> N <sub>3</sub> Ti |                 |
| Formula weight                    | 648.15                                                            |                 |
| Temperature                       | 150(2) K                                                          |                 |
| Wavelength                        | 0.71073 Å                                                         |                 |
| Crystal system                    | Monoclinic                                                        |                 |
| Space group                       | P 2 <sub>1</sub> /n                                               |                 |
| Unit cell dimensions              | a = 9.7534(5) Å                                                   | α = 90°.        |
|                                   | b = 18.8425(11) Å                                                 | β = 93.221(3)°. |
|                                   | c = 16.5548(7) Å                                                  | γ = 90°.        |
| Volume                            | 3037.6(3) Å <sup>3</sup>                                          |                 |
| Z                                 | 4                                                                 |                 |
| Density (calculated)              | 1.417 Mg/m <sup>3</sup>                                           |                 |
| Absorption coefficient            | 0.830 mm <sup>-1</sup>                                            |                 |
| F(000)                            | 1336                                                              |                 |
| Crystal size                      | 0.15 x 0.06 x 0.04 mm <sup>3</sup>                                |                 |
| Theta range for data collection   | 2.60 to 25.07°.                                                   |                 |
| Index ranges                      | -11 ≤ h ≤ 11, -20 ≤ k ≤ 22, -19 ≤ l ≤ 19                          |                 |
| Reflections collected             | 20804                                                             |                 |
| Independent reflections           | 5388 [R(int) = 0.0855]                                            |                 |
| Completeness to theta = 25.07°    | 99.6 %                                                            |                 |
| Max. and min. transmission        | 0.9675 and 0.8856                                                 |                 |
| Refinement method                 | Full-matrix least-squares on F <sup>2</sup>                       |                 |
| Data / restraints / parameters    | 5388 / 18 / 337                                                   |                 |
| Goodness-of-fit on F <sup>2</sup> | 1.020                                                             |                 |
| Final R indices [I > 2σ(I)]       | R1 = 0.0674, wR2 = 0.1630                                         |                 |
| R indices (all data)              | R1 = 0.1172, wR2 = 0.1886                                         |                 |
| Largest diff. peak and hole       | 1.290 and -1.080 e.Å <sup>-3</sup>                                |                 |

Table 7. Atomic coordinates ( $\times 10^4$ ) and equivalent isotropic displacement parameters ( $\text{\AA}^2 \times 10^3$ ) for **3a**.  $U(\text{eq})$  is defined as one third of the trace of the orthogonalized  $U^{\text{ij}}$  tensor.

|       | x       | y       | z       | U(eq) |
|-------|---------|---------|---------|-------|
| Ti(1) | 7363(1) | 2869(1) | 2762(1) | 36(1) |
| Cl(3) | 9684(2) | 3011(1) | 2884(1) | 48(1) |
| Cl(2) | 5030(2) | 3034(1) | 2697(1) | 51(1) |
| Cl(4) | 7361(2) | 1968(1) | 1841(1) | 54(1) |
| Cl(1) | 7322(2) | 2316(1) | 3956(1) | 45(1) |
| N(1)  | 7457(4) | 4496(2) | 2683(2) | 38(1) |
| N(2)  | 7375(4) | 4260(2) | 3951(3) | 39(1) |
| N(3)  | 7444(4) | 3675(2) | 1676(2) | 34(1) |
| C(1)  | 7395(5) | 3945(3) | 3223(3) | 36(1) |
| C(2)  | 7502(6) | 5142(3) | 3092(4) | 48(2) |
| C(3)  | 7453(6) | 4987(3) | 3873(4) | 50(2) |
| C(4)  | 7493(5) | 4345(3) | 1827(3) | 36(1) |
| C(5)  | 7563(6) | 5000(3) | 1280(3) | 41(1) |
| C(24) | 6262(6) | 5461(3) | 1379(4) | 54(2) |
| C(23) | 8918(6) | 5406(3) | 1503(4) | 54(2) |
| C(25) | 7580(7) | 4841(3) | 367(3)  | 59(2) |
| C(14) | 7312(6) | 3931(3) | 4742(3) | 39(1) |
| C(19) | 6029(6) | 3838(3) | 5053(3) | 43(1) |
| C(18) | 5997(6) | 3578(3) | 5846(3) | 48(2) |
| C(17) | 7201(7) | 3415(3) | 6306(3) | 50(2) |
| C(16) | 8441(6) | 3509(3) | 5960(3) | 43(1) |
| C(15) | 8537(6) | 3773(3) | 5182(3) | 41(1) |
| C(22) | 4719(6) | 4012(3) | 4573(4) | 56(2) |
| C(21) | 7139(8) | 3159(4) | 7168(3) | 65(2) |
| C(20) | 9916(6) | 3900(3) | 4845(4) | 52(2) |
| C(6)  | 7461(6) | 3394(3) | 853(3)  | 37(1) |
| C(11) | 6202(6) | 3257(3) | 430(3)  | 42(1) |
| C(10) | 6229(7) | 2928(3) | -323(3) | 50(2) |
| C(9)  | 7448(7) | 2741(3) | -644(3) | 54(2) |
| C(8)  | 8660(7) | 2893(3) | -226(3) | 50(2) |
| C(7)  | 8709(6) | 3229(3) | 533(3)  | 41(1) |

|       |          |         |         |        |
|-------|----------|---------|---------|--------|
| C(13) | 4833(6)  | 3474(4) | 733(3)  | 53(2)  |
| C(12) | 10080(6) | 3409(4) | 928(3)  | 52(2)  |
| Cl(5) | 1708(3)  | 4732(2) | 3309(2) | 134(1) |
| Cl(6) | 2686(2)  | 4958(2) | 1730(1) | 114(1) |
| C(1S) | 2491(14) | 4371(6) | 2511(4) | 85(4)  |
| C(2S) | 3110(10) | 4816(9) | 2735(3) | 85(4)  |

---

Table 8. Bond lengths [Å] and angles [°] for **3a**.

---

|             |            |
|-------------|------------|
| Ti(1)-C(1)  | 2.167(5)   |
| Ti(1)-Cl(1) | 2.2370(16) |
| Ti(1)-Cl(3) | 2.2775(18) |
| Ti(1)-Cl(4) | 2.2808(16) |
| Ti(1)-Cl(2) | 2.2930(18) |
| Ti(1)-N(3)  | 2.358(4)   |
| N(1)-C(1)   | 1.373(6)   |
| N(1)-C(2)   | 1.392(7)   |
| N(1)-C(4)   | 1.448(6)   |
| N(2)-C(1)   | 1.344(6)   |
| N(2)-C(3)   | 1.379(7)   |
| N(2)-C(14)  | 1.453(7)   |
| N(3)-C(4)   | 1.288(6)   |
| N(3)-C(6)   | 1.463(6)   |
| C(2)-C(3)   | 1.329(8)   |
| C(4)-C(5)   | 1.535(7)   |
| C(5)-C(25)  | 1.542(8)   |
| C(5)-C(23)  | 1.552(8)   |
| C(5)-C(24)  | 1.554(8)   |
| C(14)-C(19) | 1.390(8)   |
| C(14)-C(15) | 1.396(8)   |
| C(19)-C(18) | 1.403(8)   |
| C(19)-C(22) | 1.502(8)   |
| C(18)-C(17) | 1.397(8)   |
| C(17)-C(16) | 1.379(8)   |
| C(17)-C(21) | 1.512(8)   |
| C(16)-C(15) | 1.388(7)   |
| C(15)-C(20) | 1.504(8)   |
| C(6)-C(7)   | 1.390(8)   |
| C(6)-C(11)  | 1.403(7)   |
| C(11)-C(10) | 1.394(8)   |
| C(11)-C(13) | 1.508(8)   |
| C(10)-C(9)  | 1.375(9)   |
| C(9)-C(8)   | 1.367(8)   |

|                   |            |
|-------------------|------------|
| C(8)-C(7)         | 1.405(8)   |
| C(7)-C(12)        | 1.494(8)   |
| Cl(5)-C(1S)       | 1.704(6)   |
| Cl(5)-C(2S)       | 1.717(6)   |
| Cl(6)-C(2S)       | 1.712(6)   |
| Cl(6)-C(1S)       | 1.721(6)   |
|                   |            |
| C(1)-Ti(1)-Cl(1)  | 97.19(14)  |
| C(1)-Ti(1)-Cl(3)  | 82.16(15)  |
| Cl(1)-Ti(1)-Cl(3) | 92.49(6)   |
| C(1)-Ti(1)-Cl(4)  | 158.65(15) |
| Cl(1)-Ti(1)-Cl(4) | 104.16(6)  |
| Cl(3)-Ti(1)-Cl(4) | 96.34(7)   |
| C(1)-Ti(1)-Cl(2)  | 83.34(15)  |
| Cl(1)-Ti(1)-Cl(2) | 92.17(6)   |
| Cl(3)-Ti(1)-Cl(2) | 165.21(7)  |
| Cl(4)-Ti(1)-Cl(2) | 96.11(7)   |
| C(1)-Ti(1)-N(3)   | 70.42(16)  |
| Cl(1)-Ti(1)-N(3)  | 167.58(11) |
| Cl(3)-Ti(1)-N(3)  | 85.17(11)  |
| Cl(4)-Ti(1)-N(3)  | 88.23(11)  |
| Cl(2)-Ti(1)-N(3)  | 87.27(11)  |
| C(1)-N(1)-C(2)    | 110.2(4)   |
| C(1)-N(1)-C(4)    | 119.6(4)   |
| C(2)-N(1)-C(4)    | 130.2(4)   |
| C(1)-N(2)-C(3)    | 110.5(4)   |
| C(1)-N(2)-C(14)   | 128.6(4)   |
| C(3)-N(2)-C(14)   | 120.8(4)   |
| C(4)-N(3)-C(6)    | 122.3(4)   |
| C(4)-N(3)-Ti(1)   | 119.1(3)   |
| C(6)-N(3)-Ti(1)   | 118.6(3)   |
| N(2)-C(1)-N(1)    | 104.7(4)   |
| N(2)-C(1)-Ti(1)   | 136.7(4)   |
| N(1)-C(1)-Ti(1)   | 118.6(3)   |
| C(3)-C(2)-N(1)    | 106.2(5)   |
| C(2)-C(3)-N(2)    | 108.3(5)   |

|                   |          |
|-------------------|----------|
| N(3)-C(4)-N(1)    | 112.3(4) |
| N(3)-C(4)-C(5)    | 132.6(5) |
| N(1)-C(4)-C(5)    | 115.1(4) |
| C(4)-C(5)-C(25)   | 115.2(4) |
| C(4)-C(5)-C(23)   | 108.7(4) |
| C(25)-C(5)-C(23)  | 105.9(5) |
| C(4)-C(5)-C(24)   | 108.9(5) |
| C(25)-C(5)-C(24)  | 105.4(5) |
| C(23)-C(5)-C(24)  | 112.9(5) |
| C(19)-C(14)-C(15) | 122.8(5) |
| C(19)-C(14)-N(2)  | 118.1(5) |
| C(15)-C(14)-N(2)  | 118.9(5) |
| C(14)-C(19)-C(18) | 117.2(5) |
| C(14)-C(19)-C(22) | 122.2(5) |
| C(18)-C(19)-C(22) | 120.5(5) |
| C(17)-C(18)-C(19) | 121.6(5) |
| C(16)-C(17)-C(18) | 118.4(5) |
| C(16)-C(17)-C(21) | 121.1(6) |
| C(18)-C(17)-C(21) | 120.5(6) |
| C(17)-C(16)-C(15) | 122.5(5) |
| C(16)-C(15)-C(14) | 117.4(5) |
| C(16)-C(15)-C(20) | 120.6(5) |
| C(14)-C(15)-C(20) | 121.9(5) |
| C(7)-C(6)-C(11)   | 121.9(5) |
| C(7)-C(6)-N(3)    | 119.5(5) |
| C(11)-C(6)-N(3)   | 118.4(5) |
| C(10)-C(11)-C(6)  | 117.9(5) |
| C(10)-C(11)-C(13) | 118.7(5) |
| C(6)-C(11)-C(13)  | 123.4(5) |
| C(9)-C(10)-C(11)  | 121.3(6) |
| C(8)-C(9)-C(10)   | 119.5(6) |
| C(9)-C(8)-C(7)    | 122.1(6) |
| C(6)-C(7)-C(8)    | 117.1(5) |
| C(6)-C(7)-C(12)   | 124.3(5) |
| C(8)-C(7)-C(12)   | 118.6(5) |
| C(1S)-Cl(5)-C(2S) | 37.0(6)  |

|                   |          |
|-------------------|----------|
| C(2S)-Cl(6)-C(1S) | 36.9(6)  |
| Cl(5)-C(1S)-Cl(6) | 113.5(6) |
| Cl(6)-C(2S)-Cl(5) | 113.3(6) |

---

Symmetry transformations used to generate equivalent atoms:

Table 9. Anisotropic displacement parameters ( $\text{\AA}^2 \times 10^3$ ) for **3a**. The anisotropic displacement factor exponent takes the form:  $-2p^2 [ h^2 a^* 2 U^{11} + \dots + 2 h k a^* b^* U^{12} ]$

|       | U <sup>11</sup> | U <sup>22</sup> | U <sup>33</sup> | U <sup>23</sup> | U <sup>13</sup> | U <sup>12</sup> |
|-------|-----------------|-----------------|-----------------|-----------------|-----------------|-----------------|
| Ti(1) | 50(1)           | 26(1)           | 34(1)           | 0(1)            | 4(1)            | 0(1)            |
| Cl(3) | 50(1)           | 52(1)           | 44(1)           | 7(1)            | 6(1)            | 7(1)            |
| Cl(2) | 48(1)           | 51(1)           | 53(1)           | 2(1)            | 1(1)            | -6(1)           |
| Cl(4) | 92(1)           | 28(1)           | 40(1)           | -2(1)           | 7(1)            | 0(1)            |
| Cl(1) | 62(1)           | 36(1)           | 38(1)           | 5(1)            | 6(1)            | 0(1)            |
| N(1)  | 51(3)           | 25(2)           | 37(2)           | 1(2)            | 2(2)            | 1(2)            |
| N(2)  | 45(3)           | 34(3)           | 38(2)           | -5(2)           | 6(2)            | -1(2)           |
| N(3)  | 36(2)           | 33(2)           | 32(2)           | 1(2)            | 2(2)            | 2(2)            |
| C(1)  | 43(3)           | 28(3)           | 36(3)           | -2(2)           | 1(2)            | 2(2)            |
| C(2)  | 71(4)           | 24(3)           | 50(4)           | -8(3)           | 5(3)            | -4(3)           |
| C(3)  | 68(4)           | 30(3)           | 51(4)           | -10(3)          | 7(3)            | -2(3)           |
| C(4)  | 40(3)           | 34(3)           | 35(3)           | 3(2)            | 4(2)            | 2(2)            |
| C(5)  | 51(3)           | 30(3)           | 44(3)           | 9(2)            | 5(3)            | -1(3)           |
| C(24) | 64(4)           | 32(3)           | 67(4)           | 8(3)            | 4(3)            | 3(3)            |
| C(23) | 56(4)           | 34(3)           | 72(4)           | 6(3)            | 11(3)           | 2(3)            |
| C(25) | 85(5)           | 42(4)           | 49(4)           | 18(3)           | 6(3)            | 0(3)            |
| C(14) | 52(4)           | 30(3)           | 35(3)           | -8(2)           | 10(3)           | 0(3)            |
| C(19) | 52(4)           | 37(3)           | 41(3)           | -8(2)           | 6(3)            | 2(3)            |
| C(18) | 50(4)           | 46(4)           | 50(4)           | -5(3)           | 16(3)           | -6(3)           |
| C(17) | 69(4)           | 38(3)           | 42(3)           | -1(3)           | 7(3)            | -3(3)           |
| C(16) | 47(4)           | 41(3)           | 41(3)           | -4(3)           | 0(3)            | 0(3)            |
| C(15) | 45(3)           | 36(3)           | 42(3)           | -9(2)           | 7(3)            | -3(3)           |
| C(22) | 52(4)           | 60(4)           | 56(4)           | -7(3)           | 4(3)            | 8(3)            |
| C(21) | 83(5)           | 68(5)           | 43(4)           | 5(3)            | 10(3)           | -10(4)          |
| C(20) | 53(4)           | 52(4)           | 51(4)           | -4(3)           | 5(3)            | -6(3)           |
| C(6)  | 52(4)           | 26(3)           | 34(3)           | 6(2)            | 6(3)            | 3(2)            |
| C(11) | 54(4)           | 34(3)           | 37(3)           | 2(2)            | 0(3)            | -2(3)           |
| C(10) | 65(4)           | 50(4)           | 34(3)           | 2(3)            | -5(3)           | -3(3)           |
| C(9)  | 74(5)           | 54(4)           | 32(3)           | 1(3)            | 1(3)            | 0(3)            |
| C(8)  | 66(4)           | 50(4)           | 35(3)           | 4(3)            | 12(3)           | 11(3)           |
| C(7)  | 53(4)           | 37(3)           | 33(3)           | 6(2)            | 5(3)            | 5(3)            |

|       |        |        |        |        |        |        |
|-------|--------|--------|--------|--------|--------|--------|
| C(13) | 48(4)  | 64(4)  | 46(3)  | 5(3)   | -4(3)  | 1(3)   |
| C(12) | 49(4)  | 66(4)  | 41(3)  | 7(3)   | 6(3)   | 1(3)   |
| Cl(5) | 117(2) | 186(3) | 100(2) | 36(2)  | 31(2)  | -29(2) |
| Cl(6) | 71(1)  | 197(3) | 76(1)  | 4(2)   | 17(1)  | 0(2)   |
| C(1S) | 101(8) | 62(7)  | 87(7)  | -21(6) | -44(6) | 27(6)  |
| C(2S) | 101(8) | 62(7)  | 87(7)  | -21(6) | -44(6) | 27(6)  |

---

Table 10. Hydrogen coordinates ( $\times 10^4$ ) and isotropic displacement parameters ( $\text{\AA}^2 \times 10^3$ ) for **3a**.

|        | x     | y    | z     | U(eq) |
|--------|-------|------|-------|-------|
| H(2A)  | 7556  | 5601 | 2860  | 58    |
| H(3A)  | 7469  | 5320 | 4304  | 59    |
| H(24A) | 5444  | 5193 | 1193  | 81    |
| H(24B) | 6323  | 5895 | 1056  | 81    |
| H(24C) | 6198  | 5587 | 1950  | 81    |
| H(23A) | 9692  | 5147 | 1290  | 80    |
| H(23B) | 9048  | 5443 | 2092  | 80    |
| H(23C) | 8868  | 5882 | 1266  | 80    |
| H(25A) | 8424  | 4585 | 256   | 88    |
| H(25B) | 7543  | 5288 | 63    | 88    |
| H(25C) | 6782  | 4549 | 200   | 88    |
| H(18A) | 5136  | 3510 | 6075  | 58    |
| H(16A) | 9262  | 3389 | 6265  | 52    |
| H(22A) | 4725  | 3786 | 4040  | 84    |
| H(22B) | 4641  | 4527 | 4507  | 84    |
| H(22C) | 3936  | 3835 | 4860  | 84    |
| H(21A) | 7865  | 3389 | 7507  | 97    |
| H(21B) | 7270  | 2643 | 7186  | 97    |
| H(21C) | 6242  | 3278 | 7370  | 97    |
| H(20A) | 10642 | 3746 | 5239  | 78    |
| H(20B) | 10024 | 4407 | 4733  | 78    |
| H(20C) | 9980  | 3630 | 4342  | 78    |
| H(10A) | 5388  | 2832 | -621  | 60    |
| H(9A)  | 7446  | 2507 | -1152 | 64    |
| H(8A)  | 9498  | 2768 | -456  | 60    |
| H(13A) | 4192  | 3579 | 271   | 80    |
| H(13B) | 4952  | 3898 | 1073  | 80    |
| H(13C) | 4467  | 3086 | 1051  | 80    |
| H(12A) | 9989  | 3822 | 1282  | 77    |
| H(12B) | 10723 | 3521 | 512   | 77    |

|        |       |      |      |     |
|--------|-------|------|------|-----|
| H(12C) | 10427 | 3004 | 1249 | 77  |
| H(1SA) | 1944  | 3960 | 2304 | 102 |
| H(1SB) | 3407  | 4192 | 2702 | 102 |
| H(2SA) | 3680  | 5217 | 2946 | 102 |
| H(2SB) | 3671  | 4379 | 2791 | 102 |

---

Table 11. Crystal data and structure refinement for **3b**.

|                                   |                                                                     |          |
|-----------------------------------|---------------------------------------------------------------------|----------|
| Identification code               | k10226                                                              |          |
| Empirical formula                 | C <sub>29</sub> H <sub>39</sub> Cl <sub>3</sub> N <sub>3</sub> O Ti |          |
| Formula weight                    | 599.88                                                              |          |
| Temperature                       | 150(1) K                                                            |          |
| Wavelength                        | 0.71073 Å                                                           |          |
| Crystal system                    | Tetragonal                                                          |          |
| Space group                       | I 41/A                                                              |          |
| Unit cell dimensions              | a = 34.9199(4) Å                                                    | α = 90°. |
|                                   | b = 34.9199(4) Å                                                    | β = 90°. |
|                                   | c = 11.2791(2) Å                                                    | γ = 90°. |
| Volume                            | 13753.7(3) Å <sup>3</sup>                                           |          |
| Z                                 | 16                                                                  |          |
| Density (calculated)              | 1.159 Mg/m <sup>3</sup>                                             |          |
| Absorption coefficient            | 0.505 mm <sup>-1</sup>                                              |          |
| F(000)                            | 5040                                                                |          |
| Crystal size                      | 0.34 x 0.24 x 0.20 mm                                               |          |
| Theta range for data collection   | 2.61 to 27.50°.                                                     |          |
| Index ranges                      | -31 ≤ h ≤ 32, -45 ≤ k ≤ 45, -14 ≤ l ≤ 14                            |          |
| Reflections collected             | 51252                                                               |          |
| Independent reflections           | 7841 [R(int) = 0.0670]                                              |          |
| Completeness to theta = 27.50°    | 99.3 %                                                              |          |
| Refinement method                 | Full-matrix least-squares on F <sup>2</sup>                         |          |
| Data / restraints / parameters    | 7841 / 0 / 343                                                      |          |
| Goodness-of-fit on F <sup>2</sup> | 1.115                                                               |          |
| Final R indices [I > 2σ(I)]       | R1 = 0.0615, wR2 = 0.1605                                           |          |
| R indices (all data)              | R1 = 0.0899, wR2 = 0.1788                                           |          |
| Largest diff. peak and hole       | 0.475 and -0.425 e.Å <sup>-3</sup>                                  |          |

Table 12. Atomic coordinates ( $\times 10^4$ ) and equivalent isotropic displacement parameters ( $\text{\AA}^2 \times 10^3$ ) for **3b**.  $U(\text{eq})$  is defined as one third of the trace of the orthogonalized  $U^{\text{ij}}$  tensor.

|       | x       | y        | z        | U(eq) |
|-------|---------|----------|----------|-------|
| Ti(1) | 4071(1) | 9100(1)  | 1095(1)  | 34(1) |
| Cl(2) | 4214(1) | 8603(1)  | 2523(1)  | 50(1) |
| Cl(1) | 3727(1) | 8708(1)  | -170(1)  | 53(1) |
| Cl(3) | 3969(1) | 9647(1)  | -92(1)   | 45(1) |
| N(2)  | 4802(1) | 8705(1)  | -292(2)  | 33(1) |
| N(1)  | 4933(1) | 9055(1)  | 1221(2)  | 31(1) |
| N(3)  | 4510(1) | 9445(1)  | 2147(2)  | 32(1) |
| C(14) | 4614(1) | 8520(1)  | -1283(2) | 35(1) |
| O(1)  | 3580(1) | 9238(1)  | 2146(2)  | 48(1) |
| C(6)  | 4374(1) | 9787(1)  | 2737(3)  | 37(1) |
| C(3)  | 5187(1) | 8647(1)  | -40(3)   | 37(1) |
| C(5)  | 5202(1) | 9443(1)  | 2913(3)  | 41(1) |
| C(4)  | 4860(1) | 9338(1)  | 2110(2)  | 32(1) |
| C(11) | 4169(1) | 9760(1)  | 3797(3)  | 45(1) |
| C(12) | 4678(1) | 10175(1) | 1080(3)  | 50(1) |
| C(2)  | 5273(1) | 8861(1)  | 917(2)   | 36(1) |
| C(19) | 4535(1) | 8131(1)  | -1188(3) | 40(1) |
| C(24) | 5293(1) | 9076(1)  | 3624(3)  | 45(1) |
| C(18) | 4376(1) | 7954(1)  | -2188(3) | 50(1) |
| C(17) | 4291(1) | 8153(1)  | -3211(3) | 52(1) |
| C(15) | 4536(1) | 8733(1)  | -2283(3) | 40(1) |
| C(7)  | 4432(1) | 10139(1) | 2167(3)  | 45(1) |
| C(25) | 5107(1) | 9751(1)  | 3838(3)  | 51(1) |
| C(8)  | 4268(1) | 10465(1) | 2661(4)  | 55(1) |
| C(23) | 5551(1) | 9596(1)  | 2213(3)  | 44(1) |
| C(1)  | 4642(1) | 8950(1)  | 471(2)   | 33(1) |
| C(10) | 4011(1) | 10094(1) | 4257(3)  | 61(1) |
| C(13) | 4132(1) | 9387(1)  | 4458(3)  | 60(1) |
| C(9)  | 4057(1) | 10440(1) | 3696(4)  | 66(1) |
| C(22) | 4604(1) | 7910(1)  | -69(3)   | 51(1) |
| C(20) | 4628(1) | 9153(1)  | -2377(3) | 53(1) |

|       |         |         |          |       |
|-------|---------|---------|----------|-------|
| C(26) | 3327(1) | 8944(1) | 2617(5)  | 77(1) |
| C(16) | 4370(1) | 8543(1) | -3246(3) | 47(1) |
| C(29) | 3371(1) | 9597(1) | 2143(3)  | 52(1) |
| C(21) | 4118(2) | 7957(1) | -4282(4) | 83(1) |
| C(28) | 3087(1) | 9563(1) | 3136(5)  | 90(2) |
| C(27) | 3017(1) | 9143(1) | 3250(5)  | 91(2) |

---

Table 13. Bond lengths [Å] and angles [°] for **3b**.

---

|             |           |
|-------------|-----------|
| Ti(1)-O(1)  | 2.141(2)  |
| Ti(1)-C(1)  | 2.178(3)  |
| Ti(1)-N(3)  | 2.282(2)  |
| Ti(1)-Cl(1) | 2.3139(9) |
| Ti(1)-Cl(3) | 2.3595(9) |
| Ti(1)-Cl(2) | 2.4202(9) |
| N(2)-C(1)   | 1.336(3)  |
| N(2)-C(3)   | 1.388(4)  |
| N(2)-C(14)  | 1.448(3)  |
| N(1)-C(1)   | 1.374(3)  |
| N(1)-C(2)   | 1.407(3)  |
| N(1)-C(4)   | 1.431(3)  |
| N(3)-C(4)   | 1.280(3)  |
| N(3)-C(6)   | 1.447(3)  |
| C(14)-C(15) | 1.379(4)  |
| C(14)-C(19) | 1.389(4)  |
| O(1)-C(29)  | 1.450(4)  |
| O(1)-C(26)  | 1.455(4)  |
| C(6)-C(11)  | 1.397(4)  |
| C(6)-C(7)   | 1.401(5)  |
| C(3)-C(2)   | 1.347(4)  |
| C(5)-C(25)  | 1.534(4)  |
| C(5)-C(4)   | 1.541(4)  |
| C(5)-C(24)  | 1.544(4)  |
| C(5)-C(23)  | 1.548(4)  |
| C(11)-C(10) | 1.391(5)  |
| C(11)-C(13) | 1.505(5)  |
| C(12)-C(7)  | 1.503(5)  |
| C(19)-C(18) | 1.401(4)  |
| C(19)-C(22) | 1.499(4)  |
| C(18)-C(17) | 1.380(5)  |
| C(17)-C(16) | 1.391(5)  |
| C(17)-C(21) | 1.515(5)  |
| C(15)-C(16) | 1.398(4)  |

|                   |            |
|-------------------|------------|
| C(15)-C(20)       | 1.505(4)   |
| C(7)-C(8)         | 1.391(4)   |
| C(8)-C(9)         | 1.383(6)   |
| C(10)-C(9)        | 1.374(6)   |
| C(26)-C(27)       | 1.472(6)   |
| C(29)-C(28)       | 1.501(6)   |
| C(28)-C(27)       | 1.491(7)   |
| O(1)-Ti(1)-C(1)   | 165.15(10) |
| O(1)-Ti(1)-N(3)   | 97.52(9)   |
| C(1)-Ti(1)-N(3)   | 71.37(9)   |
| O(1)-Ti(1)-Cl(1)  | 93.40(7)   |
| C(1)-Ti(1)-Cl(1)  | 97.65(8)   |
| N(3)-Ti(1)-Cl(1)  | 169.00(7)  |
| O(1)-Ti(1)-Cl(3)  | 90.65(6)   |
| C(1)-Ti(1)-Cl(3)  | 98.61(8)   |
| N(3)-Ti(1)-Cl(3)  | 88.21(6)   |
| Cl(1)-Ti(1)-Cl(3) | 92.96(3)   |
| O(1)-Ti(1)-Cl(2)  | 87.58(7)   |
| C(1)-Ti(1)-Cl(2)  | 81.58(7)   |
| N(3)-Ti(1)-Cl(2)  | 83.92(6)   |
| Cl(1)-Ti(1)-Cl(2) | 95.31(4)   |
| Cl(3)-Ti(1)-Cl(2) | 171.63(4)  |
| C(1)-N(2)-C(3)    | 111.5(2)   |
| C(1)-N(2)-C(14)   | 126.3(2)   |
| C(3)-N(2)-C(14)   | 122.1(2)   |
| C(1)-N(1)-C(2)    | 110.2(2)   |
| C(1)-N(1)-C(4)    | 118.9(2)   |
| C(2)-N(1)-C(4)    | 130.8(2)   |
| C(4)-N(3)-C(6)    | 124.7(2)   |
| C(4)-N(3)-Ti(1)   | 118.07(18) |
| C(6)-N(3)-Ti(1)   | 117.04(17) |
| C(15)-C(14)-C(19) | 123.4(3)   |
| C(15)-C(14)-N(2)  | 118.8(2)   |
| C(19)-C(14)-N(2)  | 117.8(3)   |
| C(29)-O(1)-C(26)  | 107.8(3)   |

|                   |            |
|-------------------|------------|
| C(29)-O(1)-Ti(1)  | 126.60(19) |
| C(26)-O(1)-Ti(1)  | 122.0(2)   |
| C(11)-C(6)-C(7)   | 121.8(3)   |
| C(11)-C(6)-N(3)   | 120.3(3)   |
| C(7)-C(6)-N(3)    | 117.7(3)   |
| C(2)-C(3)-N(2)    | 107.4(2)   |
| C(25)-C(5)-C(4)   | 113.6(2)   |
| C(25)-C(5)-C(24)  | 105.8(3)   |
| C(4)-C(5)-C(24)   | 105.5(2)   |
| C(25)-C(5)-C(23)  | 106.0(3)   |
| C(4)-C(5)-C(23)   | 113.0(2)   |
| C(24)-C(5)-C(23)  | 112.8(3)   |
| N(3)-C(4)-N(1)    | 113.3(2)   |
| N(3)-C(4)-C(5)    | 130.6(2)   |
| N(1)-C(4)-C(5)    | 116.0(2)   |
| C(10)-C(11)-C(6)  | 117.6(3)   |
| C(10)-C(11)-C(13) | 120.5(3)   |
| C(6)-C(11)-C(13)  | 121.8(3)   |
| C(3)-C(2)-N(1)    | 106.0(2)   |
| C(14)-C(19)-C(18) | 116.6(3)   |
| C(14)-C(19)-C(22) | 122.5(3)   |
| C(18)-C(19)-C(22) | 120.8(3)   |
| C(17)-C(18)-C(19) | 122.4(3)   |
| C(18)-C(17)-C(16) | 118.4(3)   |
| C(18)-C(17)-C(21) | 121.6(3)   |
| C(16)-C(17)-C(21) | 120.0(3)   |
| C(14)-C(15)-C(16) | 117.5(3)   |
| C(14)-C(15)-C(20) | 122.8(3)   |
| C(16)-C(15)-C(20) | 119.7(3)   |
| C(8)-C(7)-C(6)    | 118.4(3)   |
| C(8)-C(7)-C(12)   | 119.6(3)   |
| C(6)-C(7)-C(12)   | 122.0(3)   |
| C(9)-C(8)-C(7)    | 120.4(4)   |
| N(2)-C(1)-N(1)    | 104.9(2)   |
| N(2)-C(1)-Ti(1)   | 138.2(2)   |
| N(1)-C(1)-Ti(1)   | 114.52(18) |

|                   |          |
|-------------------|----------|
| C(9)-C(10)-C(11)  | 121.5(4) |
| C(10)-C(9)-C(8)   | 120.3(3) |
| O(1)-C(26)-C(27)  | 106.8(3) |
| C(17)-C(16)-C(15) | 121.6(3) |
| O(1)-C(29)-C(28)  | 105.2(3) |
| C(27)-C(28)-C(29) | 104.6(4) |
| C(26)-C(27)-C(28) | 107.6(3) |

---

Table 14. Anisotropic displacement parameters ( $\text{\AA}^2 \times 10^3$ ) for **3b**. The anisotropic displacement factor exponent takes the form:  $-2p^2 [ h^2 a^* 2 U^{11} + \dots + 2 h k a^* b^* U^{12} ]$

|       | U <sup>11</sup> | U <sup>22</sup> | U <sup>33</sup> | U <sup>23</sup> | U <sup>13</sup> | U <sup>12</sup> |
|-------|-----------------|-----------------|-----------------|-----------------|-----------------|-----------------|
| Ti(1) | 30(1)           | 28(1)           | 45(1)           | 1(1)            | 0(1)            | -1(1)           |
| Cl(2) | 56(1)           | 35(1)           | 60(1)           | 11(1)           | 5(1)            | 4(1)            |
| Cl(1) | 47(1)           | 42(1)           | 70(1)           | -10(1)          | -7(1)           | -9(1)           |
| Cl(3) | 48(1)           | 38(1)           | 51(1)           | 8(1)            | -8(1)           | -3(1)           |
| N(2)  | 35(1)           | 33(1)           | 31(1)           | -7(1)           | -2(1)           | 5(1)            |
| N(1)  | 29(1)           | 34(1)           | 31(1)           | -9(1)           | -2(1)           | 5(1)            |
| N(3)  | 32(1)           | 30(1)           | 34(1)           | -1(1)           | -1(1)           | 3(1)            |
| C(14) | 37(1)           | 31(1)           | 36(1)           | -10(1)          | -4(1)           | 2(1)            |
| O(1)  | 35(1)           | 38(1)           | 69(2)           | 7(1)            | 14(1)           | 1(1)            |
| C(6)  | 34(1)           | 36(1)           | 43(2)           | -9(1)           | -4(1)           | 8(1)            |
| C(3)  | 37(1)           | 37(1)           | 36(1)           | -6(1)           | -2(1)           | 5(1)            |
| C(5)  | 39(2)           | 48(2)           | 34(1)           | -10(1)          | -6(1)           | 5(1)            |
| C(4)  | 35(1)           | 31(1)           | 30(1)           | -3(1)           | -2(1)           | -2(1)           |
| C(11) | 42(2)           | 55(2)           | 39(2)           | -12(1)          | 0(1)            | 11(1)           |
| C(12) | 59(2)           | 38(2)           | 51(2)           | 1(1)            | -10(2)          | -9(1)           |
| C(2)  | 28(1)           | 44(2)           | 36(1)           | -6(1)           | -2(1)           | 5(1)            |
| C(19) | 40(2)           | 37(2)           | 42(2)           | -11(1)          | -2(1)           | 6(1)            |
| C(24) | 43(2)           | 55(2)           | 36(2)           | -5(1)           | -2(1)           | 11(1)           |
| C(18) | 58(2)           | 34(2)           | 57(2)           | -9(1)           | -4(2)           | -4(1)           |
| C(17) | 60(2)           | 54(2)           | 41(2)           | -13(2)          | -10(2)          | -5(2)           |
| C(15) | 43(2)           | 38(2)           | 40(2)           | -4(1)           | -6(1)           | -1(1)           |
| C(7)  | 49(2)           | 33(1)           | 53(2)           | -11(1)          | -15(1)          | 8(1)            |
| C(25) | 44(2)           | 64(2)           | 46(2)           | -28(2)          | -14(1)          | 12(2)           |
| C(8)  | 57(2)           | 36(2)           | 72(2)           | -11(2)          | -19(2)          | 11(1)           |
| C(23) | 35(2)           | 48(2)           | 49(2)           | -12(1)          | -7(1)           | -5(1)           |
| C(1)  | 34(1)           | 33(1)           | 32(1)           | -1(1)           | -2(1)           | -1(1)           |
| C(10) | 47(2)           | 85(3)           | 50(2)           | -23(2)          | -1(2)           | 24(2)           |
| C(13) | 56(2)           | 80(3)           | 45(2)           | 5(2)            | 9(2)            | 11(2)           |
| C(9)  | 57(2)           | 60(2)           | 82(3)           | -32(2)          | -17(2)          | 27(2)           |
| C(22) | 70(2)           | 35(2)           | 48(2)           | 1(1)            | -3(2)           | 3(2)            |
| C(20) | 74(2)           | 44(2)           | 41(2)           | 1(1)            | -9(2)           | -16(2)          |

|       |        |       |        |        |        |        |
|-------|--------|-------|--------|--------|--------|--------|
| C(26) | 63(2)  | 52(2) | 115(4) | 15(2)  | 45(2)  | -11(2) |
| C(16) | 56(2)  | 48(2) | 37(2)  | -1(1)  | -10(1) | 1(1)   |
| C(29) | 40(2)  | 45(2) | 70(2)  | 2(2)   | 7(2)   | 9(1)   |
| C(21) | 107(4) | 76(3) | 65(3)  | -22(2) | -30(3) | -16(3) |
| C(28) | 77(3)  | 82(3) | 110(4) | 7(3)   | 33(3)  | 24(3)  |
| C(27) | 57(3)  | 89(3) | 127(4) | 5(3)   | 34(3)  | -13(2) |

---

Table 15. Hydrogen coordinates ( $\times 10^4$ ) and isotropic displacement parameters ( $\text{\AA}^2 \times 10^3$ ) for **3b**.

|        | x    | y     | z     | U(eq) |
|--------|------|-------|-------|-------|
| H(2)   | 5354 | 8489  | -455  | 44    |
| H(25A) | 4943 | 10169 | 1306  | 74    |
| H(25B) | 4622 | 10412 | 686   | 74    |
| H(25C) | 4626 | 9965  | 553   | 74    |
| H(3)   | 5508 | 8877  | 1299  | 43    |
| H(6A)  | 5498 | 9127  | 4167  | 67    |
| H(6B)  | 5367 | 8876  | 3088  | 67    |
| H(6C)  | 5069 | 8998  | 4058  | 67    |
| H(11)  | 4326 | 7693  | -2161 | 59    |
| H(8A)  | 4905 | 9661  | 4345  | 77    |
| H(8B)  | 5026 | 9980  | 3443  | 77    |
| H(8C)  | 5330 | 9804  | 4305  | 77    |
| H(22)  | 4300 | 10701 | 2292  | 66    |
| H(7A)  | 5500 | 9852  | 1948  | 66    |
| H(7B)  | 5597 | 9434  | 1540  | 66    |
| H(7C)  | 5772 | 9596  | 2717  | 66    |
| H(20)  | 3872 | 10083 | 4959  | 73    |
| H(24A) | 4139 | 9436  | 5296  | 91    |
| H(24B) | 4341 | 9221  | 4246  | 91    |
| H(24C) | 3894 | 9267  | 4254  | 91    |
| H(21)  | 3946 | 10659 | 4015  | 79    |
| H(15A) | 4491 | 7660  | -141  | 76    |
| H(15B) | 4489 | 8042  | 587   | 76    |
| H(15C) | 4874 | 7885  | 62    | 76    |
| H(17A) | 4462 | 9295  | -1859 | 79    |
| H(17B) | 4590 | 9237  | -3179 | 79    |
| H(17C) | 4889 | 9195  | -2153 | 79    |
| H(26A) | 3466 | 8777  | 3154  | 92    |
| H(26B) | 3223 | 8790  | 1977  | 92    |
| H(13)  | 4311 | 8682  | -3927 | 57    |

|        |      |      |       |     |
|--------|------|------|-------|-----|
| H(29A) | 3241 | 9635 | 1392  | 62  |
| H(29B) | 3543 | 9811 | 2279  | 62  |
| H(16A) | 4045 | 8146 | -4857 | 124 |
| H(16B) | 3896 | 7814 | -4042 | 124 |
| H(16C) | 4303 | 7786 | -4624 | 124 |
| H(28A) | 3190 | 9667 | 3866  | 108 |
| H(28B) | 2851 | 9697 | 2945  | 108 |
| H(27A) | 3015 | 9069 | 4079  | 110 |
| H(27B) | 2771 | 9077 | 2908  | 110 |

---

Table 16. Crystal data and structure refinement for **4a**.

|                                   |                                                                   |          |
|-----------------------------------|-------------------------------------------------------------------|----------|
| Identification code               | k1024a                                                            |          |
| Empirical formula                 | C <sub>25</sub> H <sub>31</sub> Cl <sub>4</sub> N <sub>3</sub> Zr |          |
| Formula weight                    | 606.55                                                            |          |
| Temperature                       | 150(2) K                                                          |          |
| Wavelength                        | 0.71073 Å                                                         |          |
| Crystal system                    | Orthorhombic                                                      |          |
| Space group                       | P n m a                                                           |          |
| Unit cell dimensions              | a = 25.3593(6) Å                                                  | α = 90°. |
|                                   | b = 10.6747(9) Å                                                  | β = 90°. |
|                                   | c = 16.5496(12) Å                                                 | γ = 90°. |
| Volume                            | 4480.0(5) Å <sup>3</sup>                                          |          |
| Z                                 | 4                                                                 |          |
| Density (calculated)              | 0.899 Mg/m <sup>3</sup>                                           |          |
| Absorption coefficient            | 0.495 mm <sup>-1</sup>                                            |          |
| F(000)                            | 1240                                                              |          |
| Crystal size                      | 0.20 x 0.18 x 0.09 mm <sup>3</sup>                                |          |
| Theta range for data collection   | 2.59 to 25.08°.                                                   |          |
| Index ranges                      | -30 ≤ h ≤ 30, -12 ≤ k ≤ 12, -19 ≤ l ≤ 19                          |          |
| Reflections collected             | 17689                                                             |          |
| Independent reflections           | 4139 [R(int) = 0.0898]                                            |          |
| Completeness to theta = 25.08°    | 98.0 %                                                            |          |
| Max. and min. transmission        | 0.9568 and 0.9074                                                 |          |
| Refinement method                 | Full-matrix least-squares on F <sup>2</sup>                       |          |
| Data / restraints / parameters    | 4139 / 0 / 180                                                    |          |
| Goodness-of-fit on F <sup>2</sup> | 2.491                                                             |          |
| Final R indices [I > 2σ(I)]       | R1 = 0.2033, wR2 = 0.5724                                         |          |
| R indices (all data)              | R1 = 0.2371, wR2 = 0.5922                                         |          |
| Largest diff. peak and hole       | 2.713 and -1.076 e.Å <sup>-3</sup>                                |          |

Table 17. Atomic coordinates ( $\times 10^4$ ) and equivalent isotropic displacement parameters ( $\text{\AA}^2 \times 10^3$ ) for **4a**.  $U(\text{eq})$  is defined as one third of the trace of the orthogonalized  $U^{\text{ij}}$  tensor.

|       | x        | y        | z         | U(eq)  |
|-------|----------|----------|-----------|--------|
| Zr(1) | 2669(1)  | 2500     | 3107(1)   | 46(1)  |
| Cl(3) | 1954(2)  | 2500     | 4058(3)   | 83(2)  |
| Cl(2) | 2783(2)  | 251(4)   | 3058(3)   | 70(1)  |
| Cl(1) | 2256(2)  | 2500     | 1813(3)   | 72(2)  |
| N(2)  | 3811(6)  | 2500     | 2004(10)  | 66(6)  |
| N(3)  | 3283(6)  | 2500     | 4274(8)   | 41(4)  |
| C(1)  | 3540(7)  | 2500     | 2727(10)  | 35(4)  |
| C(3)  | 4362(8)  | 2500     | 2192(14)  | 85(10) |
| C(4)  | 3818(7)  | 2500     | 4129(11)  | 41(4)  |
| C(5)  | 4261(7)  | 2500     | 4708(13)  | 45(5)  |
| C(6)  | 3587(8)  | 2500     | 1212(11)  | 57(6)  |
| C(7)  | 3507(5)  | 1335(15) | 862(9)    | 51(4)  |
| C(8)  | 3278(6)  | 1406(19) | 61(9)     | 62(5)  |
| C(9)  | 3163(8)  | 2500     | -279(12)  | 47(5)  |
| C(10) | 3621(7)  | 60(20)   | 1216(11)  | 88(6)  |
| C(11) | 2908(9)  | 2500     | -1146(16) | 64(7)  |
| C(12) | 3067(7)  | 2500     | 5066(12)  | 43(5)  |
| C(13) | 2942(6)  | 1335(16) | 5440(9)   | 58(4)  |
| C(14) | 2679(6)  | 1357(17) | 6143(10)  | 58(5)  |
| C(15) | 2529(10) | 2500     | 6493(16)  | 76(8)  |
| C(16) | 3112(7)  | 141(15)  | 5081(9)   | 62(4)  |
| C(17) | 4086(8)  | 2500     | 5647(11)  | 48(5)  |
| C(18) | 4608(7)  | 1263(17) | 4666(12)  | 74(5)  |
| N(1)  | 3936(5)  | 2500     | 3332(9)   | 41(4)  |
| C(2)  | 4417(9)  | 2500     | 2907(14)  | 95(11) |

---

Table 18. Bond lengths [Å] and angles [°] for **4a**.

---

|               |           |
|---------------|-----------|
| Zr(1)-C(1)    | 2.297(17) |
| Zr(1)-Cl(1)   | 2.385(5)  |
| Zr(1)-Cl(3)   | 2.401(5)  |
| Zr(1)-Cl(2)   | 2.419(5)  |
| Zr(1)-Cl(2)#1 | 2.419(5)  |
| Zr(1)-N(3)    | 2.479(14) |
| N(2)-C(1)     | 1.38(2)   |
| N(2)-C(3)     | 1.43(3)   |
| N(2)-C(6)     | 1.43(2)   |
| N(3)-C(4)     | 1.38(2)   |
| N(3)-C(12)    | 1.42(3)   |
| C(1)-N(1)     | 1.42(2)   |
| C(3)-C(2)     | 1.19(3)   |
| C(4)-N(1)     | 1.35(2)   |
| C(4)-C(5)     | 1.48(3)   |
| C(5)-C(18)    | 1.589(19) |
| C(5)-C(18)#1  | 1.589(19) |
| C(5)-C(17)    | 1.62(3)   |
| C(6)-C(7)     | 1.386(18) |
| C(6)-C(7)#1   | 1.386(18) |
| C(7)-C(8)     | 1.45(2)   |
| C(7)-C(10)    | 1.51(2)   |
| C(8)-C(9)     | 1.33(2)   |
| C(9)-C(8)#1   | 1.33(2)   |
| C(9)-C(11)    | 1.57(3)   |
| C(12)-C(13)   | 1.425(18) |
| C(12)-C(13)#1 | 1.425(18) |
| C(13)-C(14)   | 1.34(2)   |
| C(13)-C(16)   | 1.47(2)   |
| C(14)-C(15)   | 1.40(2)   |
| C(15)-C(14)#1 | 1.40(2)   |
| N(1)-C(2)     | 1.41(3)   |

|                     |           |
|---------------------|-----------|
| C(1)-Zr(1)-Cl(1)    | 100.1(4)  |
| C(1)-Zr(1)-Cl(3)    | 155.0(4)  |
| Cl(1)-Zr(1)-Cl(3)   | 104.9(2)  |
| C(1)-Zr(1)-Cl(2)    | 82.85(13) |
| Cl(1)-Zr(1)-Cl(2)   | 91.25(11) |
| Cl(3)-Zr(1)-Cl(2)   | 96.48(12) |
| C(1)-Zr(1)-Cl(2)#1  | 82.85(13) |
| Cl(1)-Zr(1)-Cl(2)#1 | 91.25(11) |
| Cl(3)-Zr(1)-Cl(2)#1 | 96.48(12) |
| Cl(2)-Zr(1)-Cl(2)#1 | 165.7(3)  |
| C(1)-Zr(1)-N(3)     | 67.0(5)   |
| Cl(1)-Zr(1)-N(3)    | 167.2(4)  |
| Cl(3)-Zr(1)-N(3)    | 87.9(4)   |
| Cl(2)-Zr(1)-N(3)    | 87.22(11) |
| Cl(2)#1-Zr(1)-N(3)  | 87.22(11) |
| C(1)-N(2)-C(3)      | 107.3(16) |
| C(1)-N(2)-C(6)      | 126.8(16) |
| C(3)-N(2)-C(6)      | 126.0(18) |
| C(4)-N(3)-C(12)     | 122.6(14) |
| C(4)-N(3)-Zr(1)     | 118.8(11) |
| C(12)-N(3)-Zr(1)    | 118.5(10) |
| N(2)-C(1)-N(1)      | 105.1(14) |
| N(2)-C(1)-Zr(1)     | 135.7(12) |
| N(1)-C(1)-Zr(1)     | 119.2(11) |
| C(2)-C(3)-N(2)      | 109.3(19) |
| N(1)-C(4)-N(3)      | 112.8(15) |
| N(1)-C(4)-C(5)      | 117.7(16) |
| N(3)-C(4)-C(5)      | 129.5(16) |
| C(4)-C(5)-C(18)     | 113.1(11) |
| C(4)-C(5)-C(18)#1   | 113.1(11) |
| C(18)-C(5)-C(18)#1  | 112.5(18) |
| C(4)-C(5)-C(17)     | 114.6(15) |
| C(18)-C(5)-C(17)    | 101.2(12) |
| C(18)#1-C(5)-C(17)  | 101.2(12) |
| C(7)-C(6)-C(7)#1    | 127.6(17) |

|                     |           |
|---------------------|-----------|
| C(7)-C(6)-N(2)      | 116.1(9)  |
| C(7)#1-C(6)-N(2)    | 116.1(9)  |
| C(6)-C(7)-C(8)      | 113.1(14) |
| C(6)-C(7)-C(10)     | 128.2(14) |
| C(8)-C(7)-C(10)     | 118.7(16) |
| C(9)-C(8)-C(7)      | 121.5(17) |
| C(8)-C(9)-C(8)#1    | 123(2)    |
| C(8)-C(9)-C(11)     | 118.5(11) |
| C(8)#1-C(9)-C(11)   | 118.5(11) |
| C(13)-C(12)-C(13)#1 | 122(2)    |
| C(13)-C(12)-N(3)    | 119.1(10) |
| C(13)#1-C(12)-N(3)  | 119.1(10) |
| C(14)-C(13)-C(12)   | 118.2(16) |
| C(14)-C(13)-C(16)   | 120.8(15) |
| C(12)-C(13)-C(16)   | 121.0(14) |
| C(13)-C(14)-C(15)   | 120.5(17) |
| C(14)-C(15)-C(14)#1 | 121(2)    |
| C(4)-N(1)-C(2)      | 132.7(17) |
| C(4)-N(1)-C(1)      | 122.1(14) |
| C(2)-N(1)-C(1)      | 105.1(16) |
| C(3)-C(2)-N(1)      | 113(2)    |

---

Symmetry transformations used to generate equivalent atoms:

#1 x,-y+1/2,z

Table 19. Anisotropic displacement parameters ( $\text{\AA}^2 \times 10^3$ ) for **4a**. The anisotropic displacement factor exponent takes the form:  $-2p^2 [ h^2 a^* 2 U^{11} + \dots + 2 h k a^* b^* U^{12} ]$

|       | U <sup>11</sup> | U <sup>22</sup> | U <sup>33</sup> | U <sup>23</sup> | U <sup>13</sup> | U <sup>12</sup> |
|-------|-----------------|-----------------|-----------------|-----------------|-----------------|-----------------|
| Zr(1) | 31(1)           | 72(2)           | 36(1)           | 0               | -1(1)           | 0               |
| Cl(3) | 36(3)           | 171(7)          | 43(3)           | 0               | 4(2)            | 0               |
| Cl(2) | 92(3)           | 65(3)           | 52(2)           | -1(2)           | -7(2)           | -15(2)          |
| Cl(1) | 50(3)           | 130(6)          | 38(3)           | 0               | -11(2)          | 0               |
| N(2)  | 27(9)           | 127(18)         | 42(10)          | 0               | -13(7)          | 0               |
| N(3)  | 38(8)           | 58(10)          | 26(8)           | 0               | -2(6)           | 0               |
| C(1)  | 40(10)          | 40(11)          | 26(9)           | 0               | -2(7)           | 0               |
| C(3)  | 28(11)          | 190(30)         | 39(13)          | 0               | 14(9)           | 0               |
| C(4)  | 40(10)          | 43(11)          | 40(10)          | 0               | -6(8)           | 0               |
| C(5)  | 44(10)          | 40(11)          | 52(12)          | 0               | 5(9)            | 0               |
| C(6)  | 57(13)          | 100(20)         | 15(9)           | 0               | -11(8)          | 0               |
| C(7)  | 30(7)           | 80(12)          | 42(8)           | 12(8)           | 3(6)            | -4(6)           |
| C(8)  | 45(8)           | 104(14)         | 38(8)           | 2(9)            | -1(6)           | -12(8)          |
| C(9)  | 46(11)          | 58(14)          | 37(10)          | 0               | -1(8)           | 0               |
| C(10) | 78(12)          | 135(18)         | 51(9)           | 20(12)          | -1(9)           | 43(12)          |
| C(11) | 47(12)          | 59(14)          | 86(17)          | 0               | -41(12)         | 0               |
| C(12) | 26(8)           | 57(12)          | 46(11)          | 0               | -13(8)          | 0               |
| C(13) | 44(8)           | 81(12)          | 48(9)           | 21(8)           | -4(7)           | -12(7)          |
| C(14) | 56(9)           | 78(13)          | 41(9)           | 9(8)            | -13(7)          | -18(8)          |
| C(15) | 55(13)          | 130(30)         | 48(14)          | 0               | 13(12)          | 0               |
| C(16) | 84(12)          | 64(11)          | 39(8)           | -1(8)           | -11(8)          | -2(9)           |
| C(17) | 46(11)          | 66(14)          | 32(10)          | 0               | -7(8)           | 0               |
| C(18) | 62(10)          | 76(13)          | 83(13)          | -16(10)         | -4(9)           | 10(8)           |
| N(1)  | 23(7)           | 64(11)          | 36(8)           | 0               | 1(6)            | 0               |
| C(2)  | 30(11)          | 220(40)         | 38(14)          | 0               | 17(9)           | 0               |

Table 20. Hydrogen coordinates ( $\times 10^4$ ) and isotropic displacement parameters ( $\text{\AA}^2 \times 10^3$ ) for **4a**.

|        | x    | y    | z     | U(eq) |
|--------|------|------|-------|-------|
| H(3)   | 4640 | 2500 | 1808  | 102   |
| H(8)   | 3208 | 655  | -226  | 75    |
| H(10A) | 3886 | 142  | 1643  | 132   |
| H(10B) | 3754 | -494 | 792   | 132   |
| H(10C) | 3296 | -288 | 1444  | 132   |
| H(11A) | 3174 | 2741 | -1547 | 96    |
| H(11B) | 2615 | 3099 | -1161 | 96    |
| H(11C) | 2775 | 1660 | -1271 | 96    |
| H(14)  | 2594 | 592  | 6406  | 70    |
| H(15)  | 2323 | 2500 | 6973  | 91    |
| H(16A) | 3146 | -493 | 5506  | 94    |
| H(16B) | 3454 | 256  | 4813  | 94    |
| H(16C) | 2851 | -137 | 4683  | 94    |
| H(17A) | 4368 | 2130 | 5975  | 73    |
| H(17B) | 3763 | 2007 | 5711  | 73    |
| H(17C) | 4022 | 3363 | 5824  | 73    |
| H(18A) | 4920 | 1360 | 5010  | 111   |
| H(18B) | 4719 | 1115 | 4107  | 111   |
| H(18C) | 4399 | 548  | 4856  | 111   |
| H(2)   | 4751 | 2500 | 3165  | 114   |

Table 21. Crystal data and structure refinement for **6b**.

|                                   |                                                                     |          |
|-----------------------------------|---------------------------------------------------------------------|----------|
| Identification code               | edwin_0m                                                            |          |
| Empirical formula                 | C <sub>30</sub> H <sub>41</sub> Cl <sub>5</sub> Cr N <sub>3</sub> O |          |
| Formula weight                    | 688.91                                                              |          |
| Temperature                       | 100(2) K                                                            |          |
| Wavelength                        | 0.71073 Å                                                           |          |
| Crystal system                    | Tetragonal                                                          |          |
| Space group                       | I4(1)/a                                                             |          |
| Unit cell dimensions              | a = 34.553(6) Å                                                     | α = 90°. |
|                                   | b = 34.553 Å                                                        | β = 90°. |
|                                   | c = 11.316(2) Å                                                     | γ = 90°. |
| Volume                            | 13510(3) Å <sup>3</sup>                                             |          |
| Z                                 | 16                                                                  |          |
| Density (calculated)              | 1.355 Mg/m <sup>3</sup>                                             |          |
| Absorption coefficient            | 0.762 mm <sup>-1</sup>                                              |          |
| F(000)                            | 5744                                                                |          |
| Crystal size                      | 0.349 x 0.101 x 0.083 mm <sup>3</sup>                               |          |
| Theta range for data collection   | 1.89 to 24.99°.                                                     |          |
| Index ranges                      | -31 ≤ h ≤ 41, -41 ≤ k ≤ 33, -13 ≤ l ≤ 13                            |          |
| Reflections collected             | 62831                                                               |          |
| Independent reflections           | 5953 [R(int) = 0.1289]                                              |          |
| Completeness to theta = 24.99°    | 100.0 %                                                             |          |
| Absorption correction             | Numerical                                                           |          |
| Max. and min. transmission        | 0.9759 and 0.8123                                                   |          |
| Refinement method                 | Full-matrix least-squares on F <sup>2</sup>                         |          |
| Data / restraints / parameters    | 5953 / 12 / 396                                                     |          |
| Goodness-of-fit on F <sup>2</sup> | 1.372                                                               |          |
| Final R indices [I > 2σ(I)]       | R1 = 0.0595, wR2 = 0.1178                                           |          |
| R indices (all data)              | R1 = 0.0942, wR2 = 0.1291                                           |          |
| Largest diff. peak and hole       | 0.583 and -0.619 e.Å <sup>-3</sup>                                  |          |

Table 22. Atomic coordinates ( $\times 10^4$ ) and equivalent isotropic displacement parameters ( $\text{\AA}^2 \times 10^3$ ) for **6b**.  $U(\text{eq})$  is defined as one third of the trace of the orthogonalized  $U^{\text{ij}}$  tensor.

|       | x       | y       | z        | $U(\text{eq})$ |
|-------|---------|---------|----------|----------------|
| Cr(1) | 891(1)  | 899(1)  | 1174(1)  | 19(1)          |
| Cl(2) | 758(1)  | 1404(1) | 2518(1)  | 29(1)          |
| Cl(1) | 1263(1) | 1295(1) | 5(1)     | 29(1)          |
| Cl(3) | 979(1)  | 387(1)  | -91(1)   | 25(1)          |
| O(1)  | 1378(1) | 747(1)  | 2184(3)  | 30(1)          |
| N(1)  | 58(1)   | 942(1)  | 1212(3)  | 17(1)          |
| N(2)  | 212(1)  | 1304(1) | -275(3)  | 17(1)          |
| N(3)  | 482(1)  | 555(1)  | 2156(3)  | 20(1)          |
| C(1)  | 364(1)  | 1052(1) | 503(4)   | 16(1)          |
| C(2)  | -280(1) | 1140(1) | 868(4)   | 20(1)          |
| C(3)  | -182(1) | 1360(1) | -60(4)   | 19(1)          |
| C(4)  | 124(1)  | 658(1)  | 2100(4)  | 17(1)          |
| C(5)  | -219(1) | 548(1)  | 2888(4)  | 23(1)          |
| C(24) | -314(1) | 921(1)  | 3602(4)  | 26(1)          |
| C(23) | -571(1) | 395(1)  | 2181(4)  | 27(1)          |
| C(25) | -124(1) | 238(1)  | 3817(4)  | 33(1)          |
| C(14) | 408(1)  | 1491(1) | -1258(4) | 18(1)          |
| C(19) | 488(1)  | 1887(1) | -1162(4) | 21(1)          |
| C(18) | 646(1)  | 2068(1) | -2147(4) | 28(1)          |
| C(17) | 730(1)  | 1865(1) | -3184(4) | 27(1)          |
| C(16) | 649(1)  | 1472(1) | -3227(4) | 28(1)          |
| C(15) | 483(1)  | 1278(1) | -2265(4) | 22(1)          |
| C(22) | 412(1)  | 2106(1) | -29(4)   | 27(1)          |
| C(21) | 900(2)  | 2069(2) | -4242(5) | 44(1)          |
| C(20) | 381(1)  | 856(1)  | -2372(4) | 30(1)          |
| C(6)  | 624(1)  | 209(1)  | 2744(4)  | 24(1)          |
| C(11) | 834(1)  | 238(1)  | 3793(4)  | 30(1)          |
| C(10) | 999(1)  | -100(2) | 4251(5)  | 42(1)          |
| C(9)  | 955(1)  | -451(2) | 3683(5)  | 46(2)          |
| C(8)  | 741(1)  | -474(1) | 2659(5)  | 38(1)          |
| C(7)  | 567(1)  | -147(1) | 2164(4)  | 28(1)          |

|        |          |          |          |        |
|--------|----------|----------|----------|--------|
| C(13)  | 862(2)   | 610(2)   | 4474(5)  | 43(1)  |
| C(12)  | 315(1)   | -186(1)  | 1094(4)  | 31(1)  |
| C(26)  | 1606(1)  | 397(1)   | 2009(5)  | 35(1)  |
| C(27)  | 1901(2)  | 406(2)   | 3003(6)  | 58(2)  |
| C(28)  | 1981(2)  | 837(2)   | 3124(7)  | 68(2)  |
| C(29)  | 1636(2)  | 1042(1)  | 2688(6)  | 59(2)  |
| C(30)  | 1995(3)  | 9208(3)  | 5520(11) | 77(3)  |
| Cl(4)  | 1915(1)  | 9233(1)  | 3991(3)  | 87(1)  |
| Cl(5)  | 2013(1)  | 9670(1)  | 6083(3)  | 109(1) |
| C(30A) | 1819(10) | 9270(11) | 5710(30) | 77(3)  |
| Cl(4A) | 1900(3)  | 9017(3)  | 4385(9)  | 87(1)  |
| Cl(5A) | 2274(4)  | 9570(3)  | 6126(10) | 109(1) |

---

Table 23. Bond lengths [Å] and angles [°] for **6b**.

---

|             |            |
|-------------|------------|
| Cr(1)-C(1)  | 2.041(4)   |
| Cr(1)-O(1)  | 2.100(3)   |
| Cr(1)-N(3)  | 2.156(3)   |
| Cr(1)-Cl(1) | 2.2954(13) |
| Cr(1)-Cl(3) | 2.2985(12) |
| Cr(1)-Cl(2) | 2.3596(12) |
| O(1)-C(26)  | 1.458(5)   |
| O(1)-C(29)  | 1.469(5)   |
| N(1)-C(1)   | 1.380(5)   |
| N(1)-C(2)   | 1.408(5)   |
| N(1)-C(4)   | 1.424(5)   |
| N(2)-C(1)   | 1.345(5)   |
| N(2)-C(3)   | 1.396(5)   |
| N(2)-C(14)  | 1.453(5)   |
| N(3)-C(4)   | 1.287(5)   |
| N(3)-C(6)   | 1.454(5)   |
| C(2)-C(3)   | 1.340(6)   |
| C(2)-H(2)   | 0.9500     |
| C(3)-H(3)   | 0.9500     |
| C(4)-C(5)   | 1.533(6)   |
| C(5)-C(25)  | 1.537(6)   |
| C(5)-C(23)  | 1.546(6)   |
| C(5)-C(24)  | 1.555(6)   |
| C(24)-H(6A) | 0.9800     |
| C(24)-H(6B) | 0.9800     |
| C(24)-H(6C) | 0.9800     |
| C(23)-H(7A) | 0.9800     |
| C(23)-H(7B) | 0.9800     |
| C(23)-H(7C) | 0.9800     |
| C(25)-H(8A) | 0.9800     |
| C(25)-H(8B) | 0.9800     |
| C(25)-H(8C) | 0.9800     |
| C(14)-C(15) | 1.381(6)   |
| C(14)-C(19) | 1.401(5)   |

|              |          |
|--------------|----------|
| C(19)-C(18)  | 1.388(6) |
| C(19)-C(22)  | 1.512(6) |
| C(18)-C(17)  | 1.396(6) |
| C(18)-H(11)  | 0.9500   |
| C(17)-C(16)  | 1.387(6) |
| C(17)-C(21)  | 1.508(6) |
| C(16)-C(15)  | 1.401(6) |
| C(16)-H(13)  | 0.9500   |
| C(15)-C(20)  | 1.506(5) |
| C(22)-H(15A) | 0.9800   |
| C(22)-H(15B) | 0.9800   |
| C(22)-H(15C) | 0.9800   |
| C(21)-H(16A) | 0.9800   |
| C(21)-H(16B) | 0.9800   |
| C(21)-H(16C) | 0.9800   |
| C(20)-H(17A) | 0.9800   |
| C(20)-H(17B) | 0.9800   |
| C(20)-H(17C) | 0.9800   |
| C(6)-C(11)   | 1.394(6) |
| C(6)-C(7)    | 1.410(6) |
| C(11)-C(10)  | 1.397(6) |
| C(11)-C(13)  | 1.501(7) |
| C(10)-C(9)   | 1.382(8) |
| C(10)-H(20)  | 0.9500   |
| C(9)-C(8)    | 1.375(8) |
| C(9)-H(21)   | 0.9500   |
| C(8)-C(7)    | 1.397(6) |
| C(8)-H(22)   | 0.9500   |
| C(7)-C(12)   | 1.497(7) |
| C(13)-H(24A) | 0.9800   |
| C(13)-H(24B) | 0.9800   |
| C(13)-H(24C) | 0.9800   |
| C(12)-H(25A) | 0.9800   |
| C(12)-H(25B) | 0.9800   |
| C(12)-H(25C) | 0.9800   |
| C(26)-C(27)  | 1.520(7) |

|                   |            |
|-------------------|------------|
| C(26)-H(26A)      | 0.9900     |
| C(26)-H(26B)      | 0.9900     |
| C(27)-C(28)       | 1.523(8)   |
| C(27)-H(27A)      | 0.9900     |
| C(27)-H(27B)      | 0.9900     |
| C(28)-C(29)       | 1.471(7)   |
| C(28)-H(28A)      | 0.9900     |
| C(28)-H(28B)      | 0.9900     |
| C(29)-H(29A)      | 0.9900     |
| C(29)-H(29B)      | 0.9900     |
| C(30)-Cl(5)       | 1.718(13)  |
| C(30)-Cl(4)       | 1.754(13)  |
| C(30)-H(30A)      | 0.9900     |
| C(30)-H(30B)      | 0.9900     |
| C(30A)-Cl(4A)     | 1.75(4)    |
| C(30A)-Cl(5A)     | 1.94(4)    |
| C(30A)-H(30C)     | 0.9900     |
| C(30A)-H(30D)     | 0.9900     |
|                   |            |
| C(1)-Cr(1)-O(1)   | 168.84(15) |
| C(1)-Cr(1)-N(3)   | 75.50(14)  |
| O(1)-Cr(1)-N(3)   | 96.10(13)  |
| C(1)-Cr(1)-Cl(1)  | 97.53(11)  |
| O(1)-Cr(1)-Cl(1)  | 90.83(9)   |
| N(3)-Cr(1)-Cl(1)  | 173.03(10) |
| C(1)-Cr(1)-Cl(3)  | 94.86(11)  |
| O(1)-Cr(1)-Cl(3)  | 92.28(9)   |
| N(3)-Cr(1)-Cl(3)  | 89.00(9)   |
| Cl(1)-Cr(1)-Cl(3) | 91.48(5)   |
| C(1)-Cr(1)-Cl(2)  | 82.82(11)  |
| O(1)-Cr(1)-Cl(2)  | 89.50(9)   |
| N(3)-Cr(1)-Cl(2)  | 86.99(9)   |
| Cl(1)-Cr(1)-Cl(2) | 92.33(5)   |
| Cl(3)-Cr(1)-Cl(2) | 175.77(5)  |
| C(26)-O(1)-C(29)  | 107.4(3)   |
| C(26)-O(1)-Cr(1)  | 124.6(3)   |

|                   |          |
|-------------------|----------|
| C(29)-O(1)-Cr(1)  | 121.6(3) |
| C(1)-N(1)-C(2)    | 110.0(3) |
| C(1)-N(1)-C(4)    | 118.5(3) |
| C(2)-N(1)-C(4)    | 131.5(3) |
| C(1)-N(2)-C(3)    | 110.9(3) |
| C(1)-N(2)-C(14)   | 127.4(3) |
| C(3)-N(2)-C(14)   | 121.6(3) |
| C(4)-N(3)-C(6)    | 125.1(3) |
| C(4)-N(3)-Cr(1)   | 116.9(3) |
| C(6)-N(3)-Cr(1)   | 117.8(2) |
| N(2)-C(1)-N(1)    | 105.0(3) |
| N(2)-C(1)-Cr(1)   | 139.3(3) |
| N(1)-C(1)-Cr(1)   | 113.3(3) |
| C(3)-C(2)-N(1)    | 106.3(3) |
| C(3)-C(2)-H(2)    | 126.8    |
| N(1)-C(2)-H(2)    | 126.8    |
| C(2)-C(3)-N(2)    | 107.8(3) |
| C(2)-C(3)-H(3)    | 126.1    |
| N(2)-C(3)-H(3)    | 126.1    |
| N(3)-C(4)-N(1)    | 112.3(3) |
| N(3)-C(4)-C(5)    | 130.3(4) |
| N(1)-C(4)-C(5)    | 117.3(3) |
| C(4)-C(5)-C(25)   | 113.9(3) |
| C(4)-C(5)-C(23)   | 113.1(3) |
| C(25)-C(5)-C(23)  | 106.5(4) |
| C(4)-C(5)-C(24)   | 105.0(3) |
| C(25)-C(5)-C(24)  | 105.5(3) |
| C(23)-C(5)-C(24)  | 112.8(3) |
| C(5)-C(24)-H(6A)  | 109.5    |
| C(5)-C(24)-H(6B)  | 109.5    |
| H(6A)-C(24)-H(6B) | 109.5    |
| C(5)-C(24)-H(6C)  | 109.5    |
| H(6A)-C(24)-H(6C) | 109.5    |
| H(6B)-C(24)-H(6C) | 109.5    |
| C(5)-C(23)-H(7A)  | 109.5    |
| C(5)-C(23)-H(7B)  | 109.5    |

|                     |          |
|---------------------|----------|
| H(7A)-C(23)-H(7B)   | 109.5    |
| C(5)-C(23)-H(7C)    | 109.5    |
| H(7A)-C(23)-H(7C)   | 109.5    |
| H(7B)-C(23)-H(7C)   | 109.5    |
| C(5)-C(25)-H(8A)    | 109.5    |
| C(5)-C(25)-H(8B)    | 109.5    |
| H(8A)-C(25)-H(8B)   | 109.5    |
| C(5)-C(25)-H(8C)    | 109.5    |
| H(8A)-C(25)-H(8C)   | 109.5    |
| H(8B)-C(25)-H(8C)   | 109.5    |
| C(15)-C(14)-C(19)   | 123.2(4) |
| C(15)-C(14)-N(2)    | 118.8(3) |
| C(19)-C(14)-N(2)    | 117.9(4) |
| C(18)-C(19)-C(14)   | 117.0(4) |
| C(18)-C(19)-C(22)   | 121.6(4) |
| C(14)-C(19)-C(22)   | 121.3(4) |
| C(19)-C(18)-C(17)   | 122.1(4) |
| C(19)-C(18)-H(11)   | 118.9    |
| C(17)-C(18)-H(11)   | 118.9    |
| C(16)-C(17)-C(18)   | 118.5(4) |
| C(16)-C(17)-C(21)   | 120.5(4) |
| C(18)-C(17)-C(21)   | 121.0(4) |
| C(17)-C(16)-C(15)   | 121.6(4) |
| C(17)-C(16)-H(13)   | 119.2    |
| C(15)-C(16)-H(13)   | 119.2    |
| C(14)-C(15)-C(16)   | 117.6(4) |
| C(14)-C(15)-C(20)   | 122.6(4) |
| C(16)-C(15)-C(20)   | 119.8(4) |
| C(19)-C(22)-H(15A)  | 109.5    |
| C(19)-C(22)-H(15B)  | 109.5    |
| H(15A)-C(22)-H(15B) | 109.5    |
| C(19)-C(22)-H(15C)  | 109.5    |
| H(15A)-C(22)-H(15C) | 109.5    |
| H(15B)-C(22)-H(15C) | 109.5    |
| C(17)-C(21)-H(16A)  | 109.5    |
| C(17)-C(21)-H(16B)  | 109.5    |

|                     |          |
|---------------------|----------|
| H(16A)-C(21)-H(16B) | 109.5    |
| C(17)-C(21)-H(16C)  | 109.5    |
| H(16A)-C(21)-H(16C) | 109.5    |
| H(16B)-C(21)-H(16C) | 109.5    |
| C(15)-C(20)-H(17A)  | 109.5    |
| C(15)-C(20)-H(17B)  | 109.5    |
| H(17A)-C(20)-H(17B) | 109.5    |
| C(15)-C(20)-H(17C)  | 109.5    |
| H(17A)-C(20)-H(17C) | 109.5    |
| H(17B)-C(20)-H(17C) | 109.5    |
| C(11)-C(6)-C(7)     | 122.1(4) |
| C(11)-C(6)-N(3)     | 120.5(4) |
| C(7)-C(6)-N(3)      | 117.3(4) |
| C(6)-C(11)-C(10)    | 118.0(5) |
| C(6)-C(11)-C(13)    | 122.1(4) |
| C(10)-C(11)-C(13)   | 119.8(5) |
| C(9)-C(10)-C(11)    | 121.0(5) |
| C(9)-C(10)-H(20)    | 119.5    |
| C(11)-C(10)-H(20)   | 119.5    |
| C(8)-C(9)-C(10)     | 120.2(5) |
| C(8)-C(9)-H(21)     | 119.9    |
| C(10)-C(9)-H(21)    | 119.9    |
| C(9)-C(8)-C(7)      | 121.5(5) |
| C(9)-C(8)-H(22)     | 119.3    |
| C(7)-C(8)-H(22)     | 119.3    |
| C(8)-C(7)-C(6)      | 117.3(5) |
| C(8)-C(7)-C(12)     | 120.3(4) |
| C(6)-C(7)-C(12)     | 122.4(4) |
| C(11)-C(13)-H(24A)  | 109.5    |
| C(11)-C(13)-H(24B)  | 109.5    |
| H(24A)-C(13)-H(24B) | 109.5    |
| C(11)-C(13)-H(24C)  | 109.5    |
| H(24A)-C(13)-H(24C) | 109.5    |
| H(24B)-C(13)-H(24C) | 109.5    |
| C(7)-C(12)-H(25A)   | 109.5    |
| C(7)-C(12)-H(25B)   | 109.5    |

|                      |           |
|----------------------|-----------|
| H(25A)-C(12)-H(25B)  | 109.5     |
| C(7)-C(12)-H(25C)    | 109.5     |
| H(25A)-C(12)-H(25C)  | 109.5     |
| H(25B)-C(12)-H(25C)  | 109.5     |
| O(1)-C(26)-C(27)     | 104.3(4)  |
| O(1)-C(26)-H(26A)    | 110.9     |
| C(27)-C(26)-H(26A)   | 110.9     |
| O(1)-C(26)-H(26B)    | 110.9     |
| C(27)-C(26)-H(26B)   | 110.9     |
| H(26A)-C(26)-H(26B)  | 108.9     |
| C(28)-C(27)-C(26)    | 102.0(4)  |
| C(28)-C(27)-H(27A)   | 111.4     |
| C(26)-C(27)-H(27A)   | 111.4     |
| C(28)-C(27)-H(27B)   | 111.4     |
| C(26)-C(27)-H(27B)   | 111.4     |
| H(27A)-C(27)-H(27B)  | 109.2     |
| C(29)-C(28)-C(27)    | 107.0(4)  |
| C(29)-C(28)-H(28A)   | 110.3     |
| C(27)-C(28)-H(28A)   | 110.3     |
| C(29)-C(28)-H(28B)   | 110.3     |
| C(27)-C(28)-H(28B)   | 110.3     |
| H(28A)-C(28)-H(28B)  | 108.6     |
| O(1)-C(29)-C(28)     | 106.9(4)  |
| O(1)-C(29)-H(29A)    | 110.3     |
| C(28)-C(29)-H(29A)   | 110.3     |
| O(1)-C(29)-H(29B)    | 110.3     |
| C(28)-C(29)-H(29B)   | 110.3     |
| H(29A)-C(29)-H(29B)  | 108.6     |
| Cl(5)-C(30)-Cl(4)    | 109.0(7)  |
| Cl(5)-C(30)-H(30A)   | 109.9     |
| Cl(4)-C(30)-H(30A)   | 109.9     |
| Cl(5)-C(30)-H(30B)   | 109.9     |
| Cl(4)-C(30)-H(30B)   | 109.9     |
| H(30A)-C(30)-H(30B)  | 108.3     |
| Cl(4A)-C(30A)-Cl(5A) | 110.3(18) |
| Cl(4A)-C(30A)-H(30C) | 109.6     |

|                      |       |
|----------------------|-------|
| Cl(5A)-C(30A)-H(30C) | 109.6 |
| Cl(4A)-C(30A)-H(30D) | 109.6 |
| Cl(5A)-C(30A)-H(30D) | 109.6 |
| H(30C)-C(30A)-H(30D) | 108.1 |

---

Table 24. Anisotropic displacement parameters ( $\text{\AA}^2 \times 10^3$ ) for **6b**. The anisotropic displacement factor exponent takes the form:  $-2p^2 [ h^2 a^2 U^{11} + \dots + 2 h k a^* b^* U^{12} ]$

|       | U <sup>11</sup> | U <sup>22</sup> | U <sup>33</sup> | U <sup>23</sup> | U <sup>13</sup> | U <sup>12</sup> |
|-------|-----------------|-----------------|-----------------|-----------------|-----------------|-----------------|
| Cr(1) | 19(1)           | 15(1)           | 24(1)           | -2(1)           | -3(1)           | 1(1)            |
| Cl(2) | 36(1)           | 19(1)           | 31(1)           | -7(1)           | -5(1)           | 4(1)            |
| Cl(1) | 24(1)           | 21(1)           | 41(1)           | 0(1)            | 4(1)            | -5(1)           |
| Cl(3) | 25(1)           | 21(1)           | 28(1)           | -6(1)           | 3(1)            | -1(1)           |
| O(1)  | 28(2)           | 21(2)           | 41(2)           | -6(1)           | -12(2)          | 1(1)            |
| N(1)  | 21(2)           | 17(2)           | 14(2)           | 6(2)            | 1(2)            | 0(1)            |
| N(2)  | 18(2)           | 17(2)           | 16(2)           | 4(1)            | -1(1)           | 1(1)            |
| N(3)  | 26(2)           | 18(2)           | 14(2)           | 0(1)            | -1(2)           | 4(2)            |
| C(1)  | 21(2)           | 16(2)           | 12(2)           | -4(2)           | 5(2)            | -4(2)           |
| C(2)  | 17(2)           | 24(2)           | 20(2)           | 2(2)            | 1(2)            | 2(2)            |
| C(3)  | 16(2)           | 24(2)           | 18(2)           | 2(2)            | 2(2)            | 2(2)            |
| C(4)  | 25(2)           | 12(2)           | 14(2)           | 0(2)            | -1(2)           | 2(2)            |
| C(5)  | 28(2)           | 28(2)           | 13(2)           | 7(2)            | 5(2)            | 5(2)            |
| C(24) | 32(2)           | 32(2)           | 15(2)           | 5(2)            | 3(2)            | 11(2)           |
| C(23) | 27(2)           | 22(2)           | 33(3)           | 5(2)            | 9(2)            | -2(2)           |
| C(25) | 36(3)           | 36(3)           | 27(3)           | 14(2)           | 11(2)           | 11(2)           |
| C(14) | 15(2)           | 20(2)           | 19(2)           | 7(2)            | 3(2)            | 0(2)            |
| C(19) | 17(2)           | 24(2)           | 22(2)           | 6(2)            | 2(2)            | 4(2)            |
| C(18) | 29(2)           | 18(2)           | 36(3)           | 6(2)            | 5(2)            | 0(2)            |
| C(17) | 29(2)           | 27(2)           | 26(3)           | 8(2)            | 8(2)            | 1(2)            |
| C(16) | 31(2)           | 31(3)           | 22(3)           | -1(2)           | 5(2)            | 1(2)            |
| C(15) | 24(2)           | 20(2)           | 21(2)           | -1(2)           | 3(2)            | -1(2)           |
| C(22) | 34(2)           | 23(2)           | 26(3)           | -1(2)           | 2(2)            | 3(2)            |
| C(21) | 57(3)           | 39(3)           | 34(3)           | 13(2)           | 20(3)           | -2(3)           |
| C(20) | 46(3)           | 24(2)           | 21(3)           | -2(2)           | 4(2)            | -9(2)           |
| C(6)  | 26(2)           | 25(2)           | 22(3)           | 10(2)           | 3(2)            | 7(2)            |
| C(11) | 25(2)           | 41(3)           | 25(3)           | 8(2)            | 4(2)            | 10(2)           |
| C(10) | 38(3)           | 56(4)           | 31(3)           | 23(3)           | 1(2)            | 17(3)           |
| C(9)  | 39(3)           | 43(3)           | 56(4)           | 30(3)           | 21(3)           | 21(2)           |
| C(8)  | 40(3)           | 25(2)           | 49(4)           | 13(2)           | 21(3)           | 13(2)           |
| C(7)  | 28(2)           | 23(2)           | 32(3)           | 8(2)            | 13(2)           | 2(2)            |

|        |        |        |        |        |        |       |
|--------|--------|--------|--------|--------|--------|-------|
| C(13)  | 48(3)  | 58(3)  | 24(3)  | -4(3)  | -7(2)  | 9(3)  |
| C(12)  | 40(3)  | 21(2)  | 34(3)  | 0(2)   | 8(2)   | -8(2) |
| C(26)  | 26(2)  | 32(3)  | 48(3)  | -1(2)  | -5(2)  | 12(2) |
| C(27)  | 46(3)  | 53(4)  | 74(5)  | -6(3)  | -29(3) | 18(3) |
| C(28)  | 32(3)  | 64(4)  | 109(6) | -30(4) | -24(3) | 2(3)  |
| C(29)  | 49(3)  | 30(3)  | 97(5)  | -12(3) | -46(3) | -7(2) |
| C(30)  | 92(7)  | 73(5)  | 67(5)  | 13(4)  | -6(5)  | -1(5) |
| Cl(4)  | 77(2)  | 121(3) | 62(2)  | -13(2) | 3(2)   | -9(2) |
| Cl(5)  | 145(4) | 75(2)  | 107(2) | -27(2) | 1(3)   | 7(2)  |
| C(30A) | 92(7)  | 73(5)  | 67(5)  | 13(4)  | -6(5)  | -1(5) |
| Cl(4A) | 77(2)  | 121(3) | 62(2)  | -13(2) | 3(2)   | -9(2) |
| Cl(5A) | 145(4) | 75(2)  | 107(2) | -27(2) | 1(3)   | 7(2)  |

---

Table 25. Hydrogen coordinates ( $\times 10^4$ ) and isotropic displacement parameters ( $\text{\AA}^2 \times 10^3$ ) for **6b**.

|        | x    | y    | z     | U(eq) |
|--------|------|------|-------|-------|
| H(2)   | -528 | 1122 | 1224  | 24    |
| H(3)   | -350 | 1524 | -495  | 23    |
| H(6A)  | -85  | 999  | 4055  | 40    |
| H(6B)  | -529 | 869  | 4144  | 40    |
| H(6C)  | -386 | 1128 | 3056  | 40    |
| H(7A)  | -625 | 570  | 1521  | 41    |
| H(7B)  | -797 | 381  | 2700  | 41    |
| H(7C)  | -512 | 136  | 1874  | 41    |
| H(8A)  | -48  | -3   | 3419  | 49    |
| H(8B)  | -353 | 189  | 4307  | 49    |
| H(8C)  | 89   | 328  | 4317  | 49    |
| H(11)  | 699  | 2337 | -2114 | 33    |
| H(13)  | 707  | 1331 | -3925 | 34    |
| H(15A) | 531  | 2363 | -77   | 41    |
| H(15B) | 523  | 1963 | 638   | 41    |
| H(15C) | 132  | 2134 | 85    | 41    |
| H(16A) | 1162 | 2159 | -4051 | 65    |
| H(16B) | 738  | 2291 | -4453 | 65    |
| H(16C) | 913  | 1889 | -4910 | 65    |
| H(17A) | 548  | 704  | -1848 | 45    |
| H(17B) | 419  | 771  | -3190 | 45    |
| H(17C) | 110  | 817  | -2146 | 45    |
| H(20)  | 1144 | -87  | 4962  | 50    |
| H(21)  | 1072 | -677 | 4000  | 55    |
| H(22)  | 712  | -718 | 2281  | 46    |
| H(24A) | 1120 | 632  | 4824  | 65    |
| H(24B) | 667  | 612  | 5102  | 65    |
| H(24C) | 817  | 828  | 3939  | 65    |
| H(25A) | 364  | -436 | 713   | 47    |
| H(25B) | 373  | 24   | 539   | 47    |

|        |      |      |      |    |
|--------|------|------|------|----|
| H(25C) | 42   | -170 | 1330 | 47 |
| H(26A) | 1735 | 400  | 1228 | 43 |
| H(26B) | 1441 | 163  | 2064 | 43 |
| H(27A) | 1793 | 297  | 3742 | 69 |
| H(27B) | 2139 | 262  | 2787 | 69 |
| H(28A) | 2031 | 904  | 3961 | 82 |
| H(28B) | 2211 | 910  | 2652 | 82 |
| H(29A) | 1506 | 1179 | 3345 | 71 |
| H(29B) | 1709 | 1233 | 2078 | 71 |
| H(30A) | 1782 | 9062 | 5902 | 93 |
| H(30B) | 2241 | 9072 | 5682 | 93 |
| H(30C) | 1759 | 9085 | 6347 | 93 |
| H(30D) | 1594 | 9445 | 5609 | 93 |

---
